# Supplementary material for: Interleukin-33 Signaling Controls the Development of Iron-Recycling Macrophages
Source: PubMed Central journal article supplement (PMC7237885; doi:10.1016/j.immuni.2020.03.006), 2020-05-19
Supplement: mmc6.pdf [file mmc6.pdf]

# Interleukin-33 Signaling Controls the Development of Iron-Recycling Macrophages

## Graphical Abstract

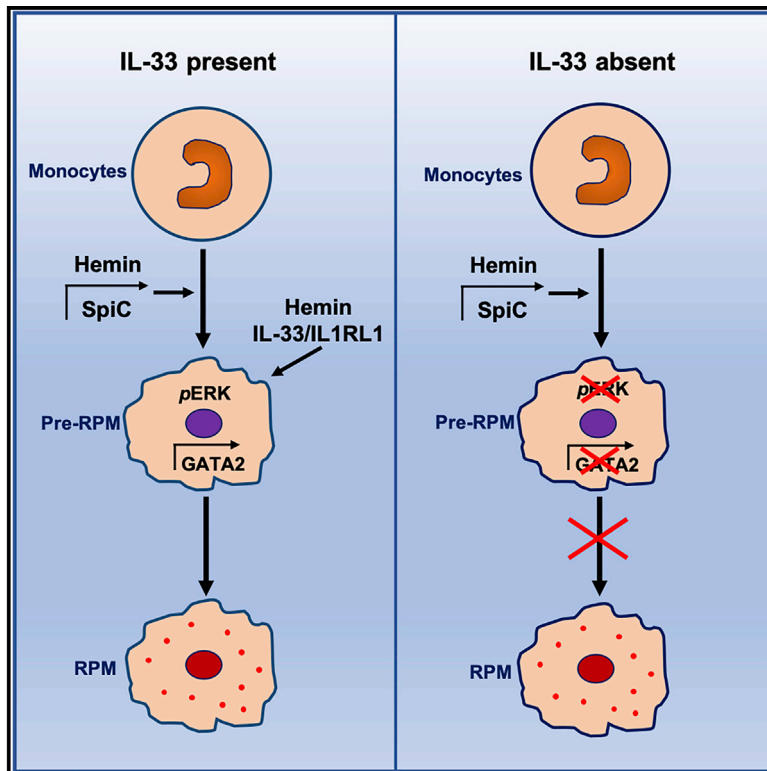

## Authors

Yuning Lu, Gemma Basatemur, Ian C. Scott, ..., E. Suzanne Cohen, Andrew N.J. McKenzie, Ziad Mallat

## Correspondence

zm255@medschl.cam.ac.uk

## In Brief

Splenic red pulp macrophages (RPMs) are critical for iron recycling. Here, Lu et al. implicate a role for IL-33 signaling in the regulation of GATA2, which controls the transition of monocytes to produce pre-RPMs that are competent to terminally differentiate into mature RPMs.

## Highlights

- IL-33 signaling promotes development of monocyte-derived red pulp macrophages (RPMs)
- *Il33*<sup>-/-</sup> and *Il1rl1*<sup>-/-</sup> mice have decreased RPMs and splenic erythrophagocytosis
- ERK activation is required for RPM development and is potentiated by hemin and IL-33
- GATA2 instructs RPM development and is aberrant in *Il1rl1*<sup>-/-</sup> RPM precursors

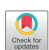

## Article

# Interleukin-33 Signaling Controls the Development of Iron-Recycling Macrophages

Yuning Lu,<sup>1</sup> Gemma Basatemur,<sup>1</sup> Ian C. Scott,<sup>2</sup> Davide Chiarugi,<sup>3</sup> Marc Clement,<sup>1</sup> James Harrison,<sup>1</sup> Ravin Jugdaohsingh,<sup>4</sup> Xian Yu,<sup>1</sup> Stephen A. Newland,<sup>1</sup> Helen E. Jolin,<sup>5</sup> Xuan Li,<sup>1</sup> Xiao Chen,<sup>1,6</sup> Monika Szymanska,<sup>7</sup> Guttorm Haraldsen,<sup>7</sup> Gaby Palmer,<sup>8,9</sup> Padraic G. Fallon,<sup>10</sup> E. Suzanne Cohen,<sup>11</sup> Andrew N.J. McKenzie,<sup>5</sup> and Ziad Mallat<sup>1,12,13,\*</sup>

<sup>1</sup>Division of Cardiovascular Medicine, University of Cambridge, Cambridge, UK

<sup>2</sup>Translational Sciences and Experimental Medicine, Early Respiratory and Immunology, Biopharmaceuticals R&D, AstraZeneca, Cambridge, UK

<sup>3</sup>The Wellcome-MRC Institute of Metabolic Science-Metabolic Research Laboratories, Cambridge, UK

<sup>4</sup>Department of Veterinary Medicine, University of Cambridge, Cambridge, UK

<sup>5</sup>Medical Research Council Laboratory of Molecular Biology, Cambridge, UK

<sup>6</sup>Department of Cardiology, Union Hospital, Tongji Medical College, Huazhong University of Science and Technology, China

<sup>7</sup>Department of Pathology, Oslo University Hospital Rikshospitalet, Norway

<sup>8</sup>Division of Rheumatology, Department of Internal Medicine Specialties, University Hospitals of Geneva, Geneva, Switzerland

<sup>9</sup>Department of Pathology-Immunology, University of Geneva School of Medicine, Geneva, Switzerland

<sup>10</sup>School of Medicine, Trinity Biomedical Sciences Institute, Trinity College Dublin, Dublin 2, Ireland

<sup>11</sup>Bioscience Asthma, Early Respiratory and Immunology, BioPharmaceuticals R&D, AstraZeneca, Cambridge, UK

<sup>12</sup>Institut National de la Santé et de la Recherche Médicale, Paris Cardiovascular Research Center, Paris, France

<sup>13</sup>Lead Contact

\*Correspondence: [zm255@medschl.cam.ac.uk](mailto:zm255@medschl.cam.ac.uk)

<https://doi.org/10.1016/j.immuni.2020.03.006>

## SUMMARY

Splenic red pulp macrophages (RPMs) contribute to erythrocyte homeostasis and are required for iron recycling. Heme induces the expression of SPIC transcription factor in monocyte-derived macrophages and promotes their differentiation into RPM precursors, pre-RPMs. However, the requirements for differentiation into mature RPMs remain unknown. Here, we have demonstrated that interleukin (IL)-33 associated with erythrocytes and co-cooperated with heme to promote the generation of mature RPMs through activation of the MyD88 adaptor protein and ERK1/2 kinases downstream of the IL-33 receptor, IL1RL1. IL-33- and IL1RL1-deficient mice showed defective iron recycling and increased splenic iron deposition. Gene expression and chromatin accessibility studies revealed a role for GATA transcription factors downstream of IL-33 signaling during the development of pre-RPMs that retained full potential to differentiate into RPMs. Thus, IL-33 instructs the development of RPMs as a response to physiological erythrocyte damage with important implications to iron recycling and iron homeostasis.

## INTRODUCTION

The development of tissue-resident macrophages from yolk-sac-derived pre-macrophages (Mass et al., 2016) or bone marrow-derived monocytes (Scott et al., 2016) requires local specification by instructive signals coming from the tissue microenvironment (Amit et al., 2016; Gautier et al., 2014; Okabe and Medzhitov, 2014). This is the case for some locally generated metabolites like retinoic acid, which is required for the polarization of peritoneal macrophages, and heme, which plays an essential role in the commitment of monocytes to a pre-red pulp macrophage (RPM) phenotype, dependent on the transcription factor SPIC (Amit et al., 2016; Haldar et al., 2014; Okabe and Medzhitov, 2014). An important physiological function of RPMs is the regulation of iron metabolism through erythrocyte clearance and iron recycling. RPMs phagocytose other blood-borne particulates and express several innate immune receptors, and may therefore be involved in the regulation of immune-inflammatory responses.

RPMs are also involved in type I interferon production in response to parasites (*P. Chabaudi*) and are able to cross-prime early effector T cell responses against viruses, and may therefore play a role in the defense against infections (Borges da Silva et al., 2015; Enders et al., 2020; Kurotaki et al., 2015).

Cytokines are important modulators of macrophage phenotype and function during inflammation and tissue repair (Bosurgi et al., 2017; Howangyin et al., 2016; Ip et al., 2017; Jenkins et al., 2011; Minutti et al., 2017). However, the requirement for a local source of cytokines during the homeostatic development and local specification of tissue-resident macrophages is not established (Amit et al., 2016). For example, local production of interleukin (IL)-34 in brain and skin is required for the development of microglia and Langerhans cells (Wang et al., 2012). However, in this case, IL-34 mostly acts as a local colony stimulating factor-1 receptor (CSF1R) ligand required for monocyte and/or macrophage survival and proliferation, rather than being involved in the functional specialization to the microglial or Langerhans

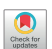

cell phenotype. Transforming growth factor- $\beta$ 1 (TGF- $\beta$ 1) is also essential for the acquisition of microglia and Langerhans cell signatures (Butovsky et al., 2014). However, the source of TGF- $\beta$ 1 has not been defined, and it is still unknown whether TGF- $\beta$ 1 signaling is required for microglia development in a cell-autonomous manner. Furthermore, granulocyte macrophage-colony stimulating factor (GM-CSF) plays a specific role in the development of alveolar macrophages (Guilliams et al., 2013; Hashimoto et al., 2013), though it is unclear whether a specific local source of GM-CSF is required for this effect. In addition, IL-10 is essential for the control of macrophage inflammatory responses through metabolic reprogramming of macrophages, inhibition of mammalian target of rapamycin (mTOR) signaling, and promotion of mitophagy (Ip et al., 2017). IL-4 is also involved in the proliferation of tissue-resident macrophages in response to type 2 inflammation (Jenkins et al., 2011) and is required together with IL-13 for the induction of a tissue repair macrophage phenotype after type 2-mediated macrophage activation (Bosurgi et al., 2017; Minutti et al., 2017) and aseptic ischemic injury (Howangyin et al., 2016). However, those cytokines are not required for the establishment of tissue-resident macrophages under homeostatic conditions.

IL-33 is a member of the IL-1 cytokine family, which plays a crucial role in initiation and amplification of immune responses to combat injury and infection (Cayrol and Girard, 2018; Liew et al., 2016; Scott et al., 2018b). IL-33 is constitutively expressed in the nucleus of epithelial cells in barrier tissues and endothelial cells of blood vessels. On release from damaged cells, IL-33 activates many different immune cell types via its receptor, interleukin receptor-like 1 (IL1RL1, also known as ST2). However, direct roles for IL-33 activity in regulating cellular differentiation and functions of mononuclear cell functions have remained poorly understood. It has been reported that IL1RL1 is not expressed on macrophages at steady state but can be induced (Kearley et al., 2015), and IL-33 signaling has been implicated in regulating osteoclast and macrophage foam cell formation (Kiyomiya et al., 2015; McLaren et al., 2010; Velickovic et al., 2015; Zaiss et al., 2011). Recent studies have highlighted the role of stromal-derived IL-33 in the generation of a pro-tumorigenic M2-like macrophage phenotype (Andersson et al., 2018) and the role of astrocyte-derived IL-33 in promoting microglial-dependent synapse engulfment and depletion, thereby affecting neural circuit function (Vainchtein et al., 2018).

The identity of the instructive signals required for the differentiation of pre-RPMs into a mature RPM phenotype remains unknown. Given the prominent roles of cytokines in the modulation of macrophage phenotype and function, we hypothesized their potential involvement in the generation of RPMs. Here, we show that IL-33 signaling plays a previously unappreciated role in the development of iron-recycling macrophages.

## RESULTS

We used previously validated assays of hemin-mediated induction of monocyte differentiation into an iron-recycling macrophage phenotype (Haldar et al., 2014) to survey potential roles of type 1 and type 2 cytokines on this process in the presence and absence of heme. We found that only IL-33 produced a significant increase in gene expression of markers of RPM phenotype

(Figures 1A and S1A). IL-33 alone had a limited impact. However, co-stimulation of macrophages with IL-33 and hemin led to a substantial increase of hemin-induced expression of *Spic* (Figure 1A). Other prototypic genes of iron-recycling macrophages including *Trem4*, *Vcam1*, and *Hmox1* were significantly upregulated (Figure 1A), whereas the expression of *Bach1*, a transcriptional repressor of *Spic* (Haldar et al., 2014), was not altered (Figure 1A). Of note, IL-33 alone substantially induced the expression of *Lcn2* (Figure 1A), which encodes a protein (Lipocalin-2) that regulates iron transport and limits microbial growth through sequestration of iron-containing siderophores (Xiao et al., 2017), further supporting a role for IL-33 in the induction of an iron-recycling RPM phenotype. We obtained similar results with IL-33 in human CD14<sup>+</sup> monocyte-derived macrophages (Figure S1B).

We then purified splenic monocytes, pre-RPMs, and RPMs, and stimulated them *in vitro* with hemin in the presence or absence of IL-33. First, we confirmed using the *Spic*<sup>igfp/igfp</sup> reporter mice (Haldar et al., 2014) that splenic RPMs (CD11b<sup>lo/-</sup> F4/80<sup>hi</sup>) are *Spic*-EGFP<sup>hi</sup>, whereas splenic pre-RPMs (CD11b<sup>hi</sup> F4/80<sup>lo</sup>) are *Spic*-EGFP<sup>lo/int</sup> (Figure S1C) and splenic monocytes (CD11b<sup>hi</sup> F4/80<sup>-</sup>) express little SPIC (not shown). This was further confirmed by gene expression analysis on sorted populations of splenic monocytes, pre-RPMs, and RPMs, which revealed intermediate expression of RPM-associated genes in pre-RPMs compared to monocytes and RPMs (Figure S1D). This supports the previous demonstration of a developmental continuum between these three cell subsets (Haldar et al., 2014). Furthermore, we found that IL-33 had a substantial impact on hemin-induced *Spic* expression only in purified pre-RPMs (Figure S1E), with no detectable effect in splenic monocytes (Figure S1E) and splenic RPMs (data not shown). These results suggested a potential requirement of IL-33 to induce the differentiation of pre-RPMs into RPMs. To test this hypothesis *in vivo*, we treated mice with hemin, IL-33, or both, and assessed the induction of pre-RPMs and RPMs. In agreement with previous work (Haldar et al., 2014), we found that hemin administration for 3 days increased the population of CD11b<sup>hi</sup> *Spic*-EGFP<sup>lo</sup> F4/80<sup>lo</sup> (Figures 1B–1E and S1F–S1H) pre-RPMs but was unable to induce the generation of CD11b<sup>lo/-</sup> F4/80<sup>hi</sup> *Spic*-EGFP<sup>hi</sup> RPMs (Figures 1B–1E and S1F–S1H). In contrast, co-administration of IL-33 with hemin led to a substantial increase of the CD11b<sup>lo/-</sup> *Spic*-EGFP<sup>hi</sup> F4/80<sup>hi</sup> RPMs (Figures 1B–1E and S1F–S1H).

The IL-33 receptor, IL1RL1, mediates IL-33 signaling. IL1RL1 deficiency did not alter hemin-induced gene expression in monocyte-derived macrophages *in vitro*, but completely abrogated IL-33-dependent upregulation of *Spic* and other RPM-associated genes (Figure S2A). To address the requirement of IL1RL1 in RPM development *in vivo*, we analyzed IL1RL1-deficient mice (Figure S2B for IL1RL1 expression on RPMs) at different time points. We found that both the percentage of RPMs (Figure 2A) and SPIC expression (Figures S2C and S2D) increased with age from neonatal days 1 and 2 to 4 weeks or 6 weeks of age in wild-type (WT) mice. IL1RL1 deficiency had no impact on RPM number in neonates but resulted in a significant ~50% and ~80% reduction in RPM number compared to WT mice at 6 and 42 weeks of age, respectively (Figures 2A and S2E). This was supported by a substantial reduction of F4/80<sup>+</sup> staining in spleen sections of IL1RL1-deficient mice compared to WT mice

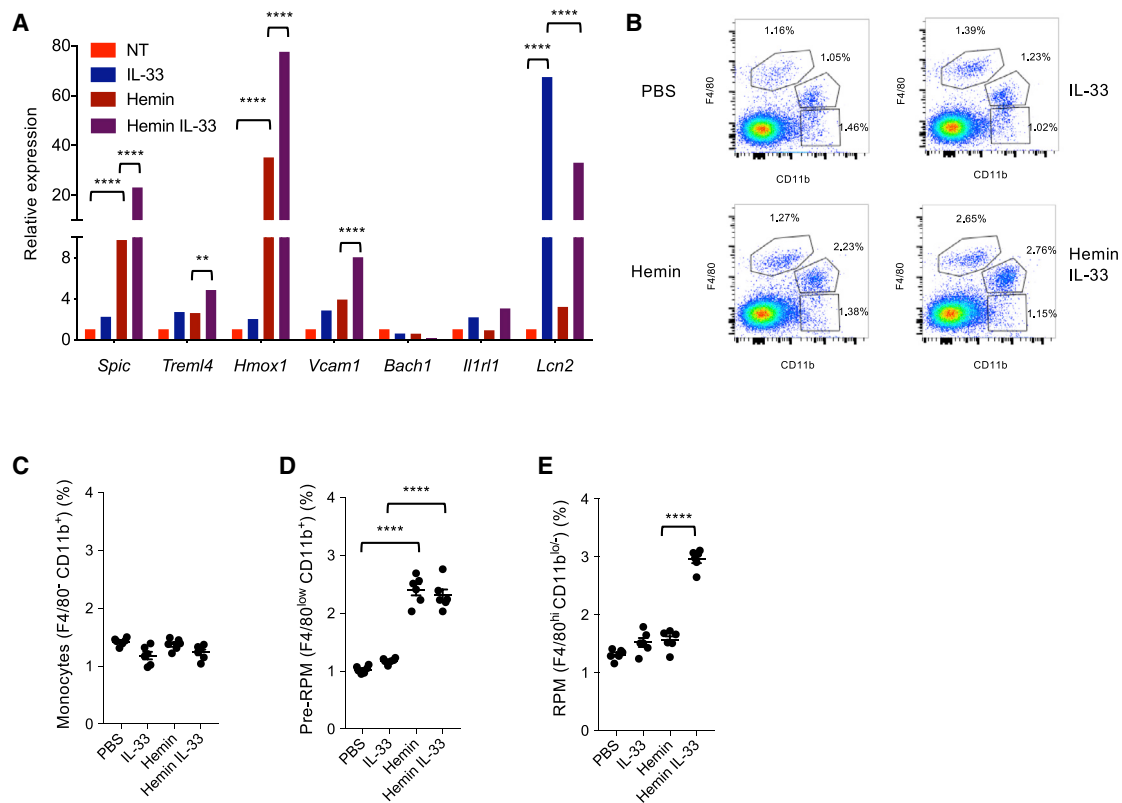

**Figure 1. IL-33 Upregulates Hemin-Induced *Spic* Expression and Promotes the Development of a Red Pulp Macrophage (RPM) Phenotype *In Vitro* and *In Vivo***

(A) Gene expression in mouse bone-marrow-derived macrophages stimulated *in vitro* for 4 days with hemin (40  $\mu$ M), IL-33 (10 ng/mL), or a combination of hemin + IL-33, compared to no treatment (NT). Data represent mean  $\pm$  SEM and are representative of five independent experiments. \*\* $p < 0.01$ , \*\*\*\* $p < 0.001$ . (B–E) Representative examples (B) and quantification (among CD45<sup>+</sup> CD11c<sup>low</sup> Ly6G<sup>low</sup> NK1.1<sup>low</sup> SSC-A<sup>low</sup> cells) of flow cytometry staining for splenic monocytes (CD11b<sup>+</sup> F4/80<sup>-</sup>) (C), pre-RPMs (CD11b<sup>+</sup> F4/80<sup>lo</sup>) (D), and RPMs (CD11b<sup>lo/-</sup> F4/80<sup>hi</sup>) (E) in mice injected intraperitoneally once a day for 3 days with either phosphate-buffered saline (PBS), IL-33 (1  $\mu$ g), hemin (500  $\mu$ g), or IL-33 + hemin. \*\*\*\* $p < 0.001$ . Data representative of at least five independent experiments. Please also see Figure S1.

at 42 weeks (Figure 2B). There was no impact of IL1RL1 deficiency on other splenic cell types (Figure S2F) or liver Kupffer macrophages (data not shown). Consistent with these data, we found that treatment of adult *Spic*<sup>igfp/igfp</sup> reporter mice with murine soluble IL1RL1-Fc fusion protein for 6 weeks, to block IL-33 signaling, significantly reduced the percentage of *Spic*-EGFP<sup>hi</sup> CD11b<sup>lo/-</sup> RPMs (without affecting pre-RPM number) in comparison with mice that received murine IgG1 (Figures 2C). We then generated mixed bone marrow chimeras (50% CD45.2 WT or 50% IL1RL1-deficient CD45.2 bone marrow + 50% CD45.1 WT bone marrow into irradiated CD45.2 WT mice) to address the cell-autonomous requirement of IL1RL1 expression in bone-marrow-derived monocytes for their differentiation into RPMs (Figure S3A). We found that splenic monocytes and pre-RPMs were generated at similar frequencies from the CD45.1 and CD45.2 bone marrow, under the basal state or after combined hemin and IL-33 stimulation, whatever the status of IL1RL1 expression (Figure S3B). By contrast, most RPMs in the 50% CD45.2 IL1RL1-deficient + 50% CD45.1 WT group originated from the CD45.1 bone marrow (Figure S3C), indicating a profound alteration of RPM generation in the absence of IL1RL1 expression in monocytes and pre-RPMs. We also lethally

irradiated CD45.1 WT mice and reconstituted them with CD45.2 bone marrow originating from either WT or IL1RL1-deficient mice. Similarly, we found a marked defect in RPM generation from the CD45.2 IL1RL1-deficient bone marrow compared to CD45.2 WT bone marrow (Figures S3D–S3F).

We then addressed the functional impact of these findings. We found that the uptake of PKH26-labeled red blood cells (RBCs) *in vivo* was reduced in RPMs, but not pre-RPMs or other cell types, in the absence of IL1RL1 (Figures S4A and S4B), suggesting defective iron-recycling capacity. Next, we measured iron stores in young (6 weeks old) and old (42 weeks old) WT and IL1RL1-deficient mice. While we found no difference in serum iron concentrations between mouse groups (Figure 3A), we detected a significant increase of spleen weight (Figure 3B) and a 3-fold increase of splenic tissue iron concentration in 42-week-old IL1RL1-deficient mice compared to WT controls (Figure 3C). Substantial iron accumulation was confirmed histologically on splenic tissue sections (Figure 3D). In case of defective iron recycling in spleen, the liver can increase its iron-recycling capacity through increased recruitment of circulating monocytes and their differentiation into iron-recycling macrophages (Theurl et al., 2016). We found iron concentrations in



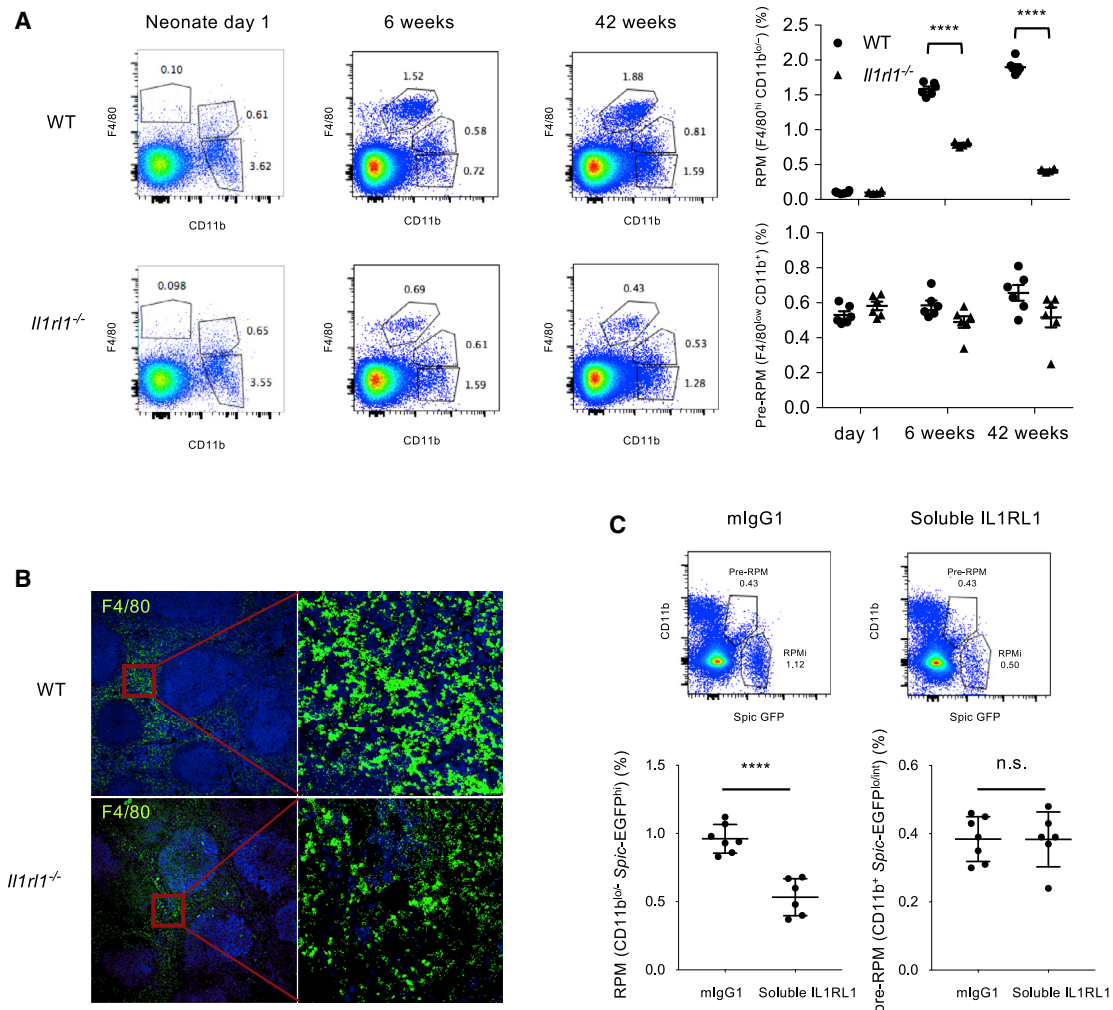

**Figure 2. IL1RL1 Signaling Controls the Development of Splenic Red Pulp Macrophages (RPMs)**

(A) Quantification (percentage among CD11c<sup>low</sup> Ly6G<sup>low</sup> NK1.1<sup>low</sup> SSC-A<sup>low</sup> cells) of splenic pre-RPMs (CD11b<sup>hi</sup> F4/80<sup>lo</sup>) and RPMs (CD11b<sup>lo/hi</sup> F4/80<sup>hi</sup>) in neonates (Day 1), young (6 weeks), and old (42 weeks) WT and *Il1rl1*<sup>-/-</sup> mice. Each dot represents a separate mouse. \*\*\*\*p < 0.001.

(B) Staining of RPs (F4/80 shown in green) in spleen sections of 42-week WT and *Il1rl1*<sup>-/-</sup> mice.

(C) Flow cytometry staining and quantification of splenic RPMs (CD11b<sup>lo/hi</sup> Spic-EGFP<sup>hi</sup>) and pre-RPMs (CD11b<sup>+</sup> Spic-EGFP<sup>lo/int</sup>) (percentages among CD11c<sup>low</sup> Ly6G<sup>low</sup> NK1.1<sup>low</sup> SSC-A<sup>low</sup> cells) after 6 weeks of treatment of *Spic<sup>lgrfp/lgrfp</sup>* reporter mice with control murine IgG1 (mlgG1) or soluble IL1RL1-murine Fc fusion protein (soluble IL1RL1). Each dot in the quantification panels represents a separate mouse. Data represent mean ± SEM. \*\*\*\*p < 0.001.

Please also see Figures S2 and S3.

liver were also substantially increased in old IL1RL1-deficient compared to WT controls (Figure 3E), suggesting that the iron-recycling capacity of liver macrophages was overwhelmed. Old IL1RL1-deficient mice (42 weeks) did not show evidence of anemia (Figure S4C). However, serum ferritin concentration was substantially higher in old IL1RL1-deficient mice compared to WT controls (Figure S4C). Taken together, our data identify a major role for the IL1RL1 signaling pathway in the differentiation of monocytes to iron-recycling RPMs.

We sought to examine which intracellular signaling pathways are involved in the process downstream of IL1RL1 activation. *Myd88*<sup>-/-</sup> mice displayed reduced numbers of RPMs (but not monocytes or pre-RPMs; data not shown) at steady state and did not increase their RPMs after *in vivo* administration of IL-33 and hemin (Figure 4A). Several signaling pathways are

activated downstream of MyD88 following IL1RL1 engagement by IL-33 (Liew et al., 2016; Pinto et al., 2015). Using a human phosphokinase assay, we found that the combination of hemin and IL-33 led to increased ERK1/2 phosphorylation in monocyte-derived macrophages *in vitro*, compared to IL-33 alone (Figure 4B). MSK1/2 phosphorylation was also marginally increased in presence of IL-33 and hemin; however, there was no combined effect on any other signaling pathways surveyed (data not shown). We confirmed the effect of IL-33 and hemin on ERK1/2 phosphorylation in mouse bone marrow monocyte-derived macrophages (Figure 4C). Next, we investigated the impact of *in vivo* inhibition of ERK1/2 for 6 weeks on RPM number. The MEK inhibitor U0126 prevented ERK1/2 phosphorylation in spleen lysates (Figure 4D) and reduced RPM (CD11b<sup>lo/hi</sup> F4/80<sup>hi</sup> Spic-EGFP<sup>hi</sup>) number compared to

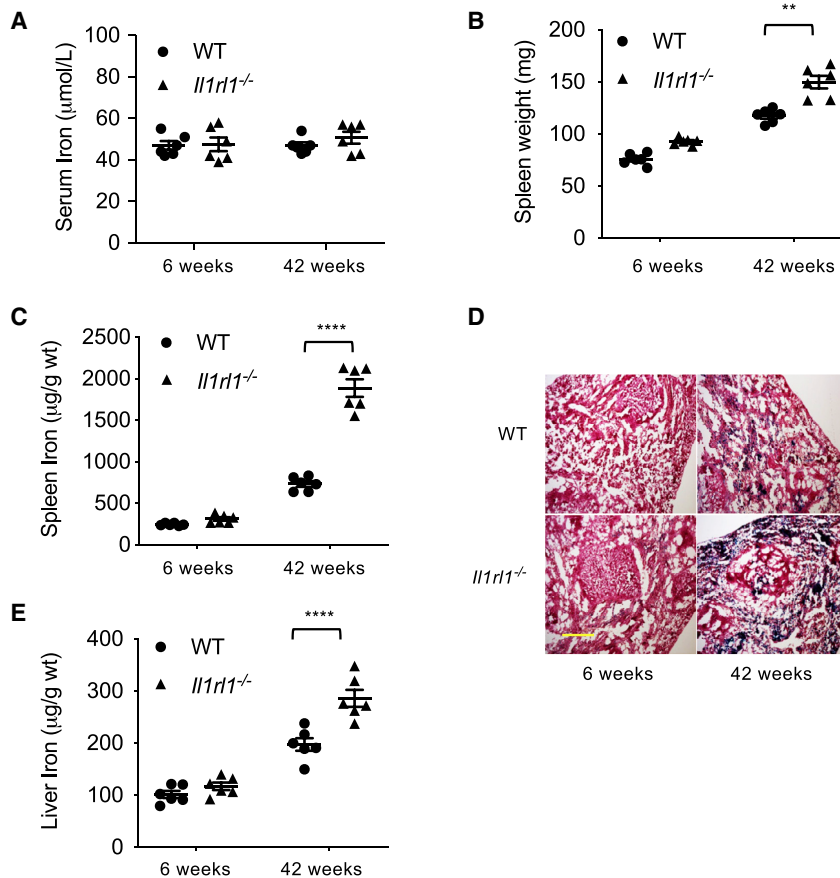

**Figure 3. Impact of IL1RL1 Signaling on the Iron-Recycling Capacity of Splenic Red Pulp Macrophages (RPMs)**

(A–C) Quantification of serum iron (A), spleen weight (B), and spleen iron (C) in young (6 weeks) and old (42 weeks) WT and *Il1rl1*<sup>-/-</sup> mice.

(D) Representative examples (6 mice per group) of Perl's blue staining (to detect iron) in spleen sections of young (6 weeks) and old (42 weeks) WT and *Il1rl1*<sup>-/-</sup> mice. Scale unit: 300 μm.

(E) Quantification of liver iron in young (6 weeks) and old (42 weeks) WT and *Il1rl1*<sup>-/-</sup> mice. Each dot represents a separate mouse. \*\**p* < 0.01, \*\*\*\**p* < 0.001.

Please also see Figure S4.

vehicle-treated mice (Figure 4E), without altering pre-RPMs (CD11b<sup>hi</sup> Spic-EGFP<sup>lo</sup> F4/80<sup>lo</sup>; Figure 4E).

We next addressed the role of endogenous IL-33 in the modulation of RPMs. Similar to IL1RL1-deficient mice, young and old IL-33-deficient mice displayed a substantial reduction of RPMs compared to WT controls (Figures 5A, S2E, and S5A), and we were able to partially restore RPM counts in IL-33-deficient mice after treatment for 4 days with IL-33 alone (Figure S5B), an effect that was further enhanced by the addition of hemin (Figure S5B). Like IL1RL1-deficient mice, old IL-33-deficient mice showed a significant increase of spleen weight, splenic tissue iron concentration, and liver iron accumulation compared to control mice (Figure 5B), strongly suggesting reduced iron-recycling capacity in the absence of IL-33. IL-33-deficient rats also showed a substantial reduction in CD11b<sup>lo</sup>EMR1<sup>hi</sup> splenic macrophages (EMR1 is the homolog of F4/80) compared to control animals (Figure S5C), further supporting a role for IL-33 signaling in the development and/or maintenance of RPMs.

Next, we investigated the potential source of endogenous IL-33 that could modulate RPMs. As IL-33 and hemin co-operated to promote the iron-recycling macrophage phenotype, we hypothesized that IL-33 might be co-expressed with hemin in erythrocytes. We therefore analyzed IL-33 expression in RBCs and their progenitors. We detected a ~31 kDa full-length form of IL-33 protein (Cayrol et al., 2018; Scott et al., 2018a) in WT, but not IL-33-deficient murine erythrocyte lysates (Figure 5C). Human IL-33 was weakly detectable in full-length form but was

predominantly detected as a ~29 kDa form in human erythrocyte lysates (Figure 5C; and data not shown). This ~29 kDa form was also seen in the recombinant full-length control (Figures 5C and S6A) and was detected in highly enriched CD235a<sup>+</sup> human erythrocytes using two additional anti-IL-33 antibodies (Figure S6A). IL-33 protein expression in human erythrocyte lysates was confirmed by ELISA (Figures 5D and S6B). We explored mechanisms for the association of IL-33 by erythrocytes. One possibility is that erythroid precursors express IL-33. Another possibility is that erythrocytes bind IL-33, either via IL1RL1-dependent

or -independent pathways. Using *Il33*-Citrate reporter mice, we found that only ~5% of erythrocyte progenitors expressed IL-33 (Figure S6C), broadly consistent with low amounts of IL-33 in mature erythrocytes. Among bone marrow cells, IL1RL1 was preferentially expressed in erythroid progenitors (stage B erythroblasts; Kounlis et al., 2011), but not mature erythrocytes (Figure S6D; and data not shown), and was capable of binding and internalizing recombinant IL-33 (Figure S6E). Consistent with this observation, we found that IL-33 was significantly lower in erythrocyte lysates of IL1RL1-deficient mice compared to WT mice (Figure 5D). We then addressed the *in vivo* relevance of erythrocyte-associated IL-33 to the development of RPMs. Notably, reconstitution of IL-33-deficient mice with WT, but not IL-33-deficient erythrocytes, predominantly restored RPMs without affecting pre-RPM numbers (Figure 5E), whereas reconstitution of IL-33-deficient mice with erythrocytes from IL1RL1-deficient mice partially restored RPM numbers (Figure S6F). Thus, erythrocytes can provide both heme and IL-33 to induce the development of monocyte-derived RPMs. However, it is plausible that IL-33 expressed by other cell types in the spleen may also contribute IL-33 to enable the development of RPMs.

To provide further mechanistic insight into how IL1RL1-dependent IL-33 signaling promotes the development of monocyte-derived RPMs, we compared the transcriptomes of splenic monocytes, pre-RPMs, and RPMs from WT and IL1RL1-deficient mice (Figure 6; Tables S1–S3). The global gene expression profile of each cell type was very similar for

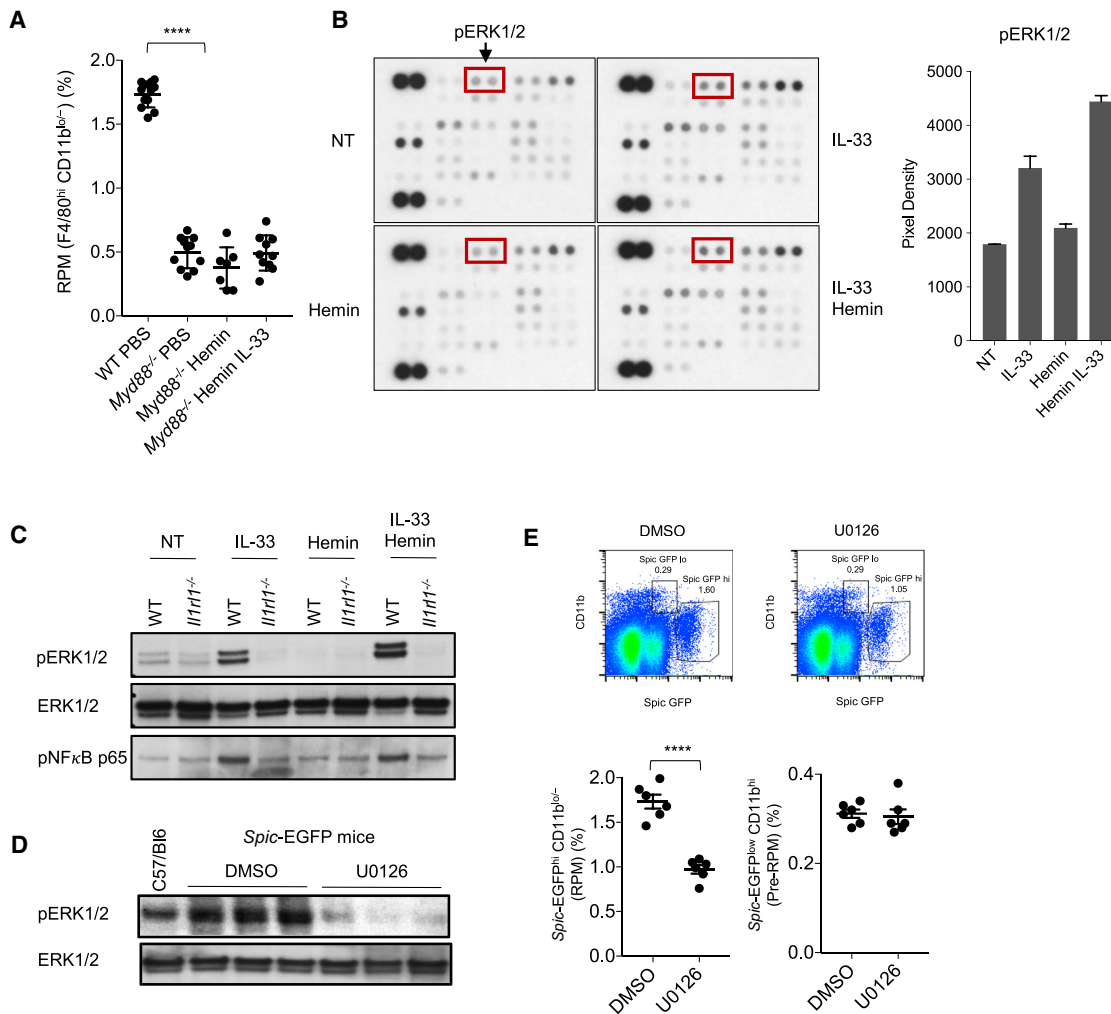

**Figure 4. MyD88 and ERK1/2 Signaling Downstream of IL-33 Control the Development of Red Pulp Macrophages (RPMs)**

(A) Quantification of RPMs (percentage among CD11c<sup>low</sup> Ly6G<sup>low</sup> NK1.1<sup>low</sup> SSC-A<sup>low</sup> cells) in spleens of WT and *Myd88*<sup>-/-</sup> mice with or without treatment with hemin alone or IL-33 + hemin (one daily injection for 3 days; see STAR Methods).

(B) Human macrophages (generated by culture of CD14<sup>+</sup> monocytes from blood) treated for 5 min with phosphate-buffered saline (NT), hemin (40 μM), IL-33 (10 ng/mL), or a combination of hemin + IL-33, and assessed using a phospho-kinase array. pERK1/2 is shown in red boxes. Quantification of the intensity of ERK1/2 phosphorylation signal (pixel density) was performed using ImageJ. Data represent mean ± SEM and are representative of three independent experiments.

(C) Mouse bone-marrow-derived macrophages of WT and *Il1rl1*<sup>-/-</sup> mice treated *in vitro* for 5 min with PBS (NT), hemin, IL-33, or a combination of hemin + IL-33, and assessed for pERK1/2, ERK1/2, and phospho-p65 (NF-κB) using western blotting. Semi-quantification of signal intensity (mean ± SEM) of ERK1/2 phosphorylation (pERK/Total ERK) using ImageJ yielded WT IL-33: 0.74 ± 0.02 versus WT IL-33+Hemin: 1.24 ± 0.09, p < 0.05. Semi-quantification of signal intensity (mean ± SEM) of p65 phosphorylation using ImageJ yielded WT IL-33: 11750 ± 3500 versus WT IL-33+Hemin: 12607 ± 4500, p = 0.09.

(D and E) C57/Bl6 *Spic*<sup>tgfp/tgfp</sup> reporter mice were treated with ERK1/2 inhibitor U0126 or DMSO control for 6 weeks (see STAR Methods). ERK1/2 phosphorylation in splenic extracts (D), and splenic CD11b<sup>low</sup> *Spic*-EGFP<sup>hi</sup> RPMs and CD11b<sup>+</sup> *Spic*-EGFP<sup>int</sup> pre-RPMs (percentages among CD11c<sup>low</sup> Ly6G<sup>low</sup> NK1.1<sup>low</sup> SSC-A<sup>low</sup> cells) (E), were quantified at the end of the experiment. A control non-reporter untreated mouse (C57/Bl6) is included as control in (D).

Each lane in (C) and (D) represents a separate mouse. Each dot in (E) represents a separate mouse. \*\*\*\*p < 0.001.

WT and IL1RL1-deficient mice (Figures 6A and 6B, respectively). However, we identified a small number of differentially expressed genes between WT and IL1RL1-deficient splenocytes, with most differences in the pre-RPM cell population (Table S2), consistent with our prior observations that IL-33 promotes the development of RPMs from pre-RPMs *in vivo*.

We performed pathway analysis to identify potential transcriptional regulators of the genes that were differentially expressed between monocytes and pre-RPMs and between pre-RPMs

and RPMs. Many of the same upstream regulators were identified in WT and in IL1RL1-deficient mice (Figure 6C). However, we noted that the transcription factors GATA2 and ETS1 (which is potentially regulated by GATA2; Linnemann et al., 2011), were implicated in the differentiation of monocytes to pre-RPMs and downregulated in IL1RL1-deficient pre-RPMs (Figure 6D; Table S2).

To further investigate the changes in gene expression that govern the differentiation of monocytes to RPMs, we assessed

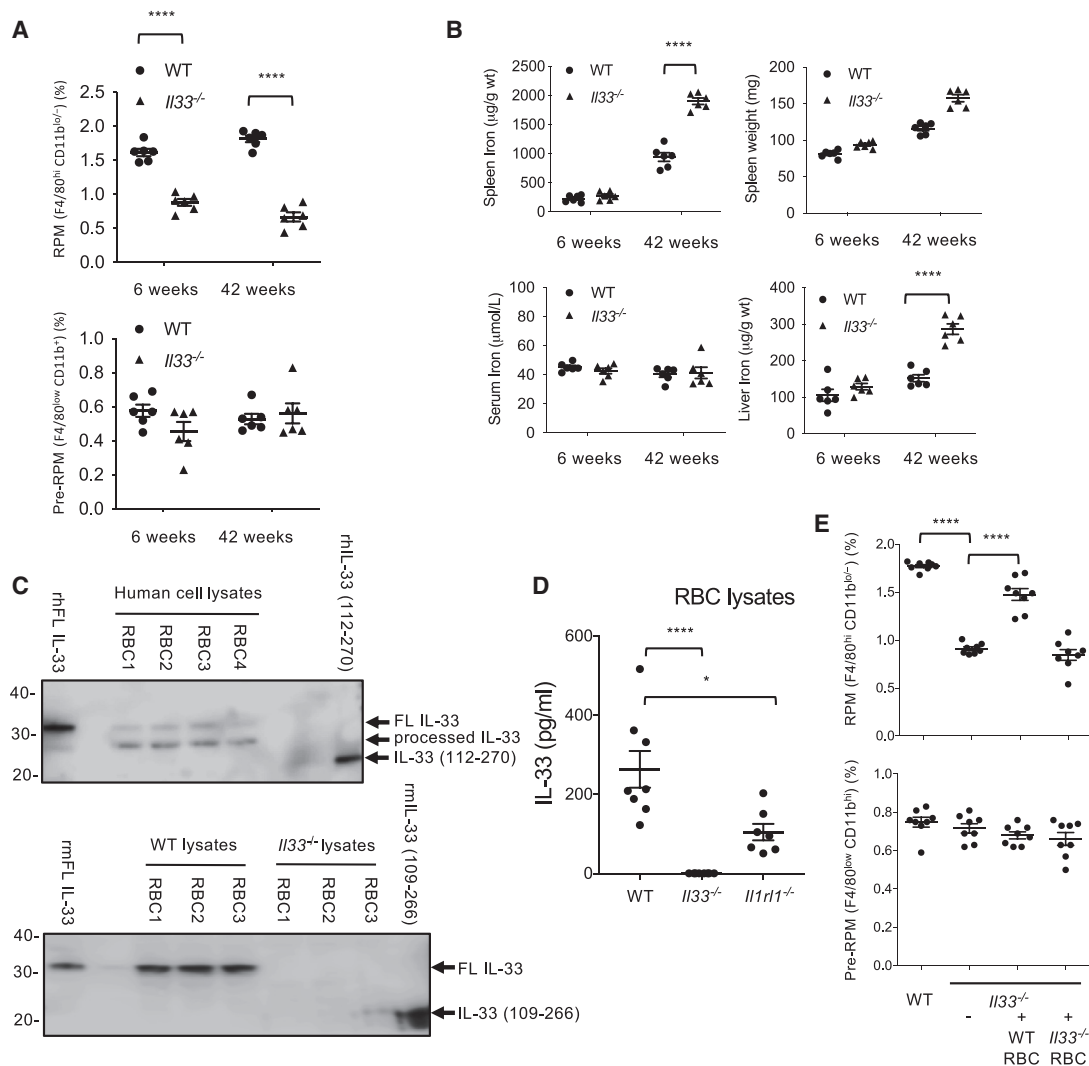

**Figure 5. Red-Blood-Cell-Derived IL-33 Controls the Development of Splenic Red Pulp Macrophages (RPMs)**

(A) Quantification of RPMs and pre-RPMs (percentage among CD11c<sup>low</sup> Ly6G<sup>low</sup> NK1.1<sup>low</sup> SSC-A<sup>low</sup> cells) in spleens of young (6 weeks) and old (42 weeks) WT and *Il33*<sup>-/-</sup> mice.

(B) Quantification of serum iron, spleen weight, spleen iron, and liver iron in young (6 weeks) and old (42 weeks) WT and *Il33*<sup>-/-</sup> mice.

(C) Detection of IL-33 in human (top panel) and mouse (lower panel) red blood cell (RBC) lysates using western blotting. Recombinant full-length and processed human and mouse IL-33 are included as positive controls. RBC lysates from *Il33*<sup>-/-</sup> mice are included as negative controls. Each lane is from a separate mouse or individual, representative of at least five independent experiments.

(D) Quantification of IL-33 protein in RBC lysates of WT, *Il33*<sup>-/-</sup> (negative control), and *Il1r1*<sup>-/-</sup> mice.

(E) Quantification (percentage among CD11c<sup>low</sup> Ly6G<sup>low</sup> NK1.1<sup>low</sup> SSC-A<sup>low</sup> cells) of splenic pre-RPMs (CD11b<sup>hi</sup> F4/80<sup>lo</sup>) and RPMs (CD11b<sup>lo/-</sup> F4/80<sup>hi</sup>) by flow cytometry in WT and *Il33*<sup>-/-</sup> mice. Some *Il33*<sup>-/-</sup> mice were reconstituted with either WT or *Il33*<sup>-/-</sup> RBCs (see STAR Methods) prior to assessment of splenic pre-RPMs and RPMs.

Each dot in (A), (B), (D), and (E) represents a separate mouse. \*\*\*\*p < 0.001. Please also see Figure S5 and S6.

chromatin accessibility by ATAC-seq and then performed motif enrichment analysis to identify potentially important transcription factor binding sites in accessible regions of chromatin from splenic monocytes, pre-RPMs, and RPMs from WT and *Il1r1*-deficient mice (Figure S7A; Table S4). There was a high degree of overlap in the accessible chromatin regions of each cell type between WT and *Il1r1*-deficient mice (Figure S7A). However, GATA motifs were specifically enriched in monocytes in genes that were downregulated from monocytes to pre-RPMs, and in pre-RPMs in genes

that were downregulated from pre-RPMs to RPMs, from WT but not *Il1r1*-deficient mice (Figure 7A; Table S4). Indeed, accessible regions of chromatin that were unique to WT (i.e., inaccessible in *Il1r1*-deficient mice) were enriched for GATA motifs within 100 kb of genes that were dynamically regulated in monocytes to pre-RPMs and in pre-RPMs to RPMs (Figure 7A). Thus, analysis of chromatin accessibility by ATAC-seq provided independent evidence for a role of GATA transcription factor signaling downstream of *Il1r1* in the development of monocyte-derived RPMs.



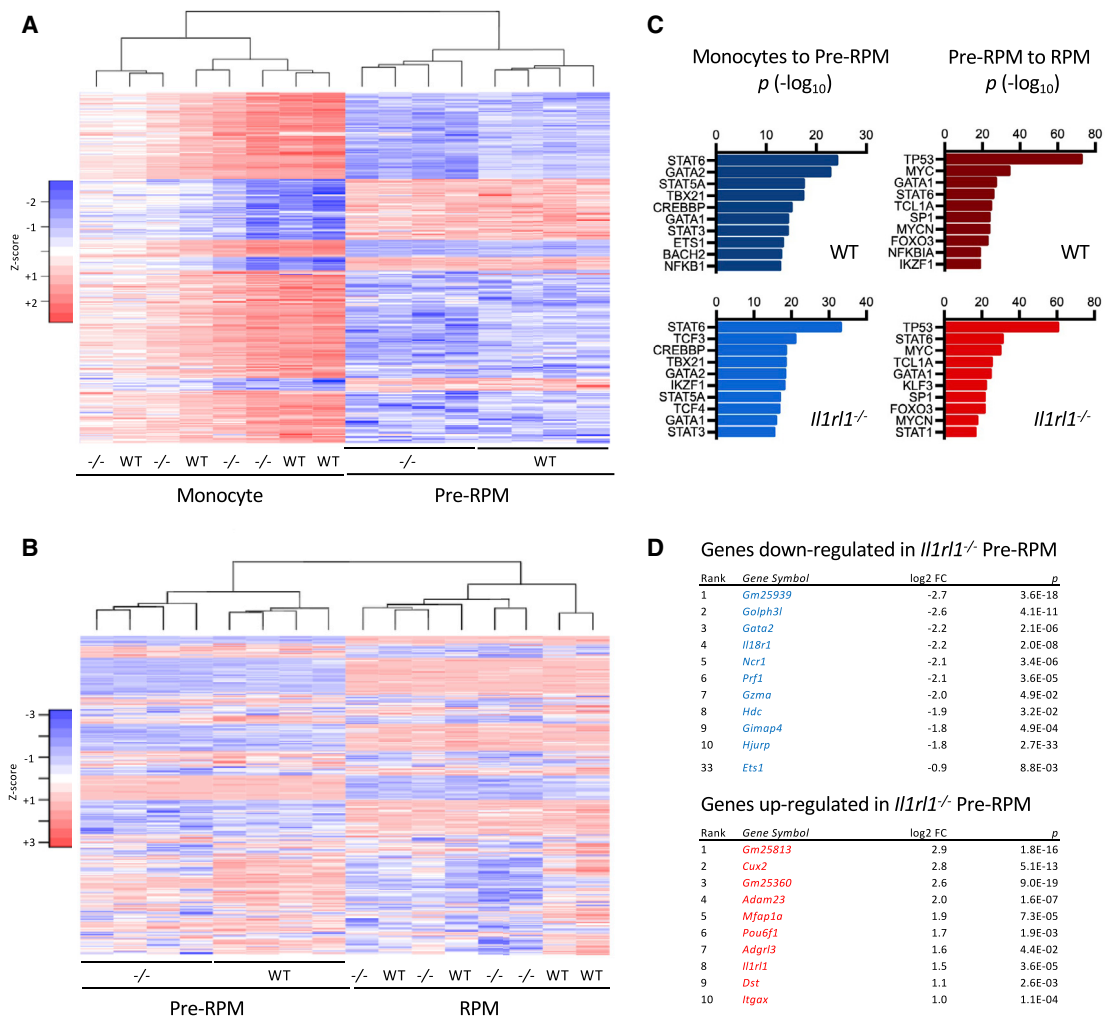

**Figure 6. GATA2 Is Implicated in the Development of Splenic Red Pulp Macrophages (RPMs) and Differentially Expressed in WT and *Il1rl1*<sup>-/-</sup> Pre-RPMs**

(A) Heatmap showing relative expression of genes differentially expressed between WT monocytes and WT pre-RPMs (693 genes, log<sub>2</sub> fold change > 1, adjusted p value < 0.01) in splenic monocytes (CD11b<sup>hi</sup> F4/80<sup>-</sup>) and pre-RPMs (CD11b<sup>hi</sup> F4/80<sup>lo</sup>) from WT and *Il1rl1*<sup>-/-</sup> mice; n = 4 separate mice per group. (B) Heatmap showing relative expression of genes differentially expressed between WT pre-RPMs and WT RPMs (3079 genes, log<sub>2</sub> fold change > 1, adjusted p value < 0.01) in pre-RPMs (CD11b<sup>hi</sup> F4/80<sup>lo</sup>) and RPMs (CD11b<sup>lo/-</sup> F4/80<sup>hi</sup>) from WT and *Il1rl1*<sup>-/-</sup> mice; n = 4 separate mice per group

(C) Top upstream transcriptional regulators for transcriptomic changes from monocytes to pre-RPMs, or pre-RPMs to RPMs, in WT and *Il1rl1*<sup>-/-</sup> mice, identified by Ingenuity pathway analysis. Note: the top regulators in each group were significant in both groups.

(D) Top differentially expressed genes in pre-RPMs (CD11b<sup>hi</sup> F4/80<sup>lo</sup>) from WT and *Il1rl1*<sup>-/-</sup> mice; n = 4 separate mice per group.

Please see also [Table S2](#) and [Figure S7](#).

Expression of *Gata2* and *Gata3* was strongly downregulated, while *Gata1* expression was induced, in the differentiation of monocytes to RPMs, in both WT and IL1RL1-deficient mice ([Figure 7B](#)). This pattern of gene expression is consistent with a “GATA switch,” in which GATA1 replaces GATA2 at regulatory elements to affect changes in gene expression, as is well-documented in other pathways of hematopoiesis ([Bresnick et al., 2010](#)). GATA1 was identified, alongside GATA2, as another potential upstream regulator of the genes differentially expressed from monocytes to pre-RPMs, indicating that a GATA switch may indeed be involved in regulating this transition. However, there was a marked difference in the dynamics of *Gata2* expression in WT and IL1RL1-deficient mice ([Figure 7B](#)). In WT mice,

*Gata2* expression was downregulated upon differentiation of pre-RPMs to RPMs; however, in IL1RL1-deficient mice, expression of *Gata2* was downregulated earlier, upon differentiation of monocytes to pre-RPMs ([Figure 7B](#)). It is likely that such a decrease in *Gata2* expression at this earlier stage would accentuate the GATA-switch-dependent changes in gene expression in the transition of monocytes to pre-RPMs, in IL1RL1-deficient mice compared to WT mice. Indeed, although the transcriptomes of WT and IL1RL1-deficient pre-RPMs were very similar, pathway analysis identified GATA2 and ETS1 as potential upstream regulators of most of the genes that were differentially expressed in WT versus IL1RL1-deficient pre-RPMs ([Figure S7B](#)). However, most compellingly, almost all of the genes that were

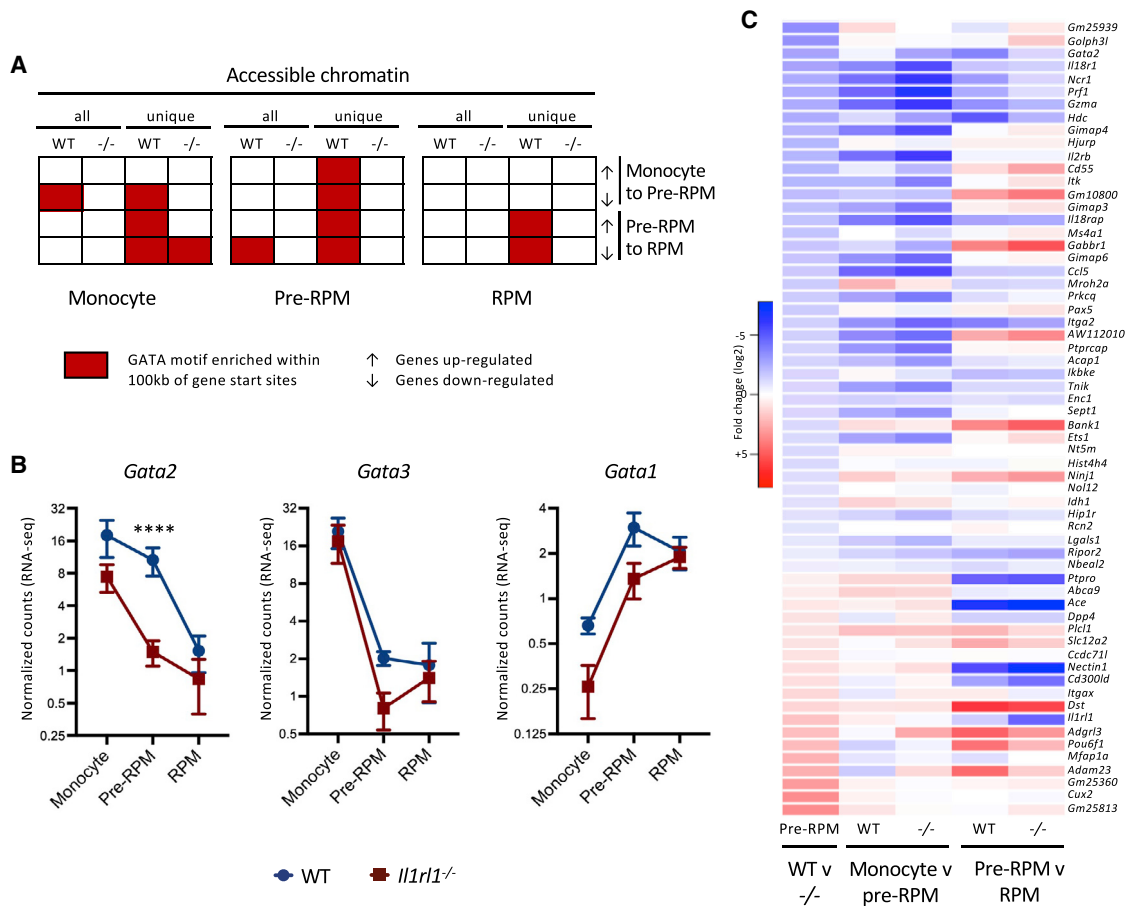

**Figure 7. A GATA Switch May Underlie Changes in Gene Expression in the Development of Splenic Red Pulp Macrophages (RPMs)**

(A) Identification of GATA motifs in accessible chromatin of splenic monocytes (CD11b<sup>hi</sup> F4/80<sup>-</sup>), pre-RPMs (CD11b<sup>hi</sup> F4/80<sup>lo</sup>), and RPMs (CD11b<sup>lo/-</sup> F4/80<sup>hi</sup>), within 100 kb of the start sites of genes differentially expressed between WT monocytes and WT pre-RPMs, or WT pre-RPMs and WT RPMs (both log<sub>2</sub> fold change > 1, adjusted p value < 0.05). Motif enrichment was performed on accessible chromatin from each splenocyte population that was unique to WT or unique to *Il1r1*<sup>-/-</sup> mice; n = 4 separate mice per group.

(B) Relative *Gata* gene expression (normalized counts, cpm) in splenic monocytes (CD11b<sup>hi</sup> F4/80<sup>-</sup>), pre-RPMs (CD11b<sup>hi</sup> F4/80<sup>lo</sup>), and RPMs (CD11b<sup>lo/-</sup> F4/80<sup>hi</sup>) of WT (green) and *Il1r1*<sup>-/-</sup> mice (red); n = 4 separate mice per group. Data are represented as mean ± SEM. \*\*\*\* adjusted p (WT v -/-) < 0.001.

(C) Heatmaps showing log<sub>2</sub> fold changes of genes differentially expressed in WT and *Il1r1*<sup>-/-</sup> pre-RPMs (adjusted p value < 0.05) between splenic monocytes (CD11b<sup>hi</sup> F4/80<sup>-</sup>) and pre-RPMs (CD11b<sup>hi</sup> F4/80<sup>lo</sup>), or pre-RPMs (CD11b<sup>hi</sup> F4/80<sup>lo</sup>) and RPMs (CD11b<sup>lo/-</sup> F4/80<sup>hi</sup>), from WT and *Il1r1*<sup>-/-</sup> mice; n = 4 per group. Please see also Figure S7.

differentially expressed between WT and IL1RL1-deficient pre-RPMs could be accounted for by accentuated changes in gene expression in the transition of monocytes to pre-RPMs in IL1RL1-deficient mice compared to WT mice (Figure 7C). Combined, these data support a role for IL1R1-dependent signaling in regulating the expression of GATA2, which is a key orchestrator of the transcriptional events in the development of monocyte-derived pre-RPMs that are capable of maturing to RPMs.

**DISCUSSION**

Local environmental cues are important in the specification of tissue-resident macrophages. This is the case for erythrocyte-derived heme that induces the expression of SPIC in monocytes, and contributes to the RPM differentiation program by establishing a precursor pre-RPM phenotype (Haldar et al., 2014).

Here, we have shown that IL-33 signaling via its receptor, IL1RL1, is required for the optimal generation of mature monocyte-derived RPMs. Mechanisms for how IL-33 regulates the functions of mononuclear cells have remained obscure despite roles in regulating mononuclear cell phenotypes (Andersson et al., 2018; Kiyomiya et al., 2015; McLaren et al., 2010; Vainchtein et al., 2018; Velickovic et al., 2015; Zaiss et al., 2011). Here, we implicated a role for IL-33 signaling in maintaining GATA2 activity that is important in regulating the changes in gene expression which, at least in part, instructed the transition of monocytes to pre-RPMs. By regulating GATA2 expression, IL-33 signaling influenced this transition to produce pre-RPMs that were competent to go on to fully differentiate to RPMs. In contrast, in the absence of IL-33 signaling, aberrant GATA2 expression led to terminal differentiation at a pre-RPM-like stage. Further resolution of the signaling pathways involved in the cooperation between heme and IL-33 for the development

of mature RPMs will require additional investigations; however, our studies highlight a role for IL-33 combined with hemin in driving ERK1/2 activation, which culminates in fine-tuning of *Gata2* expression. The implication of ERK1/2 in the process was inferred from studies using a MEK inhibitor and will therefore require validation using genetic silencing.

GATA2 is an established regulator of myelopoiesis, with well-documented context and dose-dependent effects on stem and progenitor cell proliferation, quiescence, self-renewal, and differentiation (Kitajima et al., 2006; Ling et al., 2004; Nandakumar et al., 2015). *Gata2* expression is highest in stem and progenitor cells and downregulated during commitment in the monocyte lineage (Akashi et al., 2000). Further studies are required to ascertain the downstream effects of GATA2 that confer competency to pre-RPMs to continue to differentiate to RPMs, although our data implicate a potentially important role for a GATA switch, similar to those previously shown to regulate the expression of a number of GATA2 target genes, including *Gata2* itself and some lineage-specific transcription factors such as the monocyte and macrophage lineage transcription factor PU.1 (also known as *Sfp1*; Chou et al., 2009). Interactions between GATA1 and heme have previously been implicated in the control of erythropoiesis, notably in regulating the expression of genes involved in heme biosynthesis (Tanimura et al., 2016), and many of these genes were differentially expressed in the development of monocytes to RPMs (data not shown). Previous studies have also highlighted a role for a “definitive-hematopoiesis-specific” enhancer region, containing GATA, Ets, and AP-1 binding sites, 9.5 kb downstream of the *Gata2* transcriptional start site (Gao et al., 2013; Johnson et al., 2012). We found this region was accessible in WT but not IL1R1-deficient pre-RPMs (data not shown). We speculate that IL-33-mediated activation of ERK1/2 may regulate the recruitment of transcription factors to *Gata2* regulatory elements, such as the +9.5 enhancer, to regulate *Gata2* expression in the development of monocytes to pre-RPMs.

Here, we sought to clarify sources of IL-33 required for RPM development. We have discovered that native erythrocytes accumulate IL-33 and that erythrocyte-associated IL-33 is sufficient for RPM development *in vivo*. Erythrocytes have been shown to play a role in the storage and release of cytokines, although IL-33 was not investigated (Karsten et al., 2018). To date, evidence for expression of IL-33 on hematopoietic cells is very limited; however, it is noteworthy that platelets and *in vitro* cultured CD34<sup>+</sup> erythroid progenitors were reported to express IL-33 (Takeda et al., 2016; Wei et al., 2015). Here, we have provided evidence for the existence of IL-33 in erythrocytes, using multiple techniques and supported by specificity controls, including samples from IL-33-deficient mice and highly purified erythrocyte preparations. In contrast to the detection of full-length IL-33 in murine erythrocytes, we found that IL-33 in human erythrocyte preparations was highly susceptible to proteolytic processing. Full-length IL-33 is biologically active; however, it is possible that proteolytic processing might regulate IL-33 activity (Lefrançois et al., 2014; Scott et al., 2018a). We could not rule out that this processing might have occurred during *ex vivo* handling, and further work is required to understand the nature of this processing and its biological relevance.

We explored mechanisms underlying the accumulation of IL-33 in erythrocytes. IL-33 localizes to the nucleus in nucleated cells, and it is unclear how IL-33 is stored in erythrocytes lacking a cell nucleus. We have found evidence for IL-33 gene transcription in bone-marrow-derived erythrocyte precursors consistent with studies in related hematopoietic cell precursors (Takeda et al., 2016; Wei et al., 2015). We also observed a partial role for IL1RL1 in acquiring and/or maintaining IL-33 in erythrocytes. However, overall, our data are inconsistent with IL-33 detected in mature erythrocytes being maintained on the cell surface by IL1RL1. The ELISA used to measure IL-33 in erythrocyte lysates does not detect IL-33 in complex with IL1RL1 (I.C.S. and E.S.C., unpublished data), and we were unable to detect endogenous IL-33 on the surface of erythrocytes or erythrocyte precursors (data not shown). We demonstrated the expression of IL1RL1 with binding activity on erythrocyte precursors in the bone marrow. Although the function of IL1RL1 during erythrocyte development is poorly understood, there is evidence for a role for IL-33 signaling in enucleation of erythroid precursors (Lopez-Yrigoyen et al., 2019). Still, additional studies will be required to elucidate mechanisms by which erythrocytes maintain a store of IL-33 in the absence of a nucleus and to further investigate the role of IL1RL1 in the bone marrow during the development of erythrocytes.

In conclusion, we have shown that IL-33 is unique in its local requirement for the development and specification of a tissue-resident macrophage phenotype, and in its cooperation with an essential biochemical compound (heme) generated by the same source, to fulfil its homeostatic function. This pathway is essential for the normal regulation of iron recycling. Similarly to its role as an alarmin in initiating immune responses during tissue damage, IL-33 appears to act as an alarmin during physiological damage of senescent erythrocytes, thereby instructing the differentiation of a specific subset of tissue-resident macrophages involved in the clearance of senescent erythrocytes and the recycling of their iron content. Beyond its role in iron homeostasis and the response to erythrocyte damage, IL-33 might also be involved in other immunological properties of RPMs, including the response to infections (Kurotaki et al., 2015).

## STAR★METHODS

Detailed methods are provided in the online version of this paper and include the following:

- KEY RESOURCES TABLE
- LEAD CONTACT AND MATERIALS AVAILABILITY
- EXPERIMENTAL MODEL AND SUBJECT DETAILS
  - Mice
- METHOD DETAILS
  - Hemin preparation
  - Bone marrow transplants
  - Spleen, liver and serum iron analysis
  - Histochemical analysis
  - Differentiation of bone marrow-derived macrophages
  - Flow cytometry
  - Cytokine quantification
  - Quantitative RT-PCR

- PKH26-staining of Mouse RBCs and analysis of PKH26-stained cells
- Crude RBC lysates preparation
- Enriched human RBC lysates preparation
- SDS-PAGE and western blot analysis
- RNA-sequencing analysis in splenocytes
- ATAC-sequencing analysis in splenocytes
- Differential gene expression (DGE) analysis
- ATAC peak calling & Meme
- **QUANTIFICATION AND STATISTICAL ANALYSIS**
- **DATA AND CODE AVAILABILITY**

### SUPPLEMENTAL INFORMATION

Supplemental Information can be found online at <https://doi.org/10.1016/j.immuni.2020.03.006>.

### ACKNOWLEDGMENTS

Z.M. is supported by a British Heart Foundation professorship and grants (CH/10/001/27642, RG/15/11/31593, and PG/17/9/32834), and by Inserm. P.G.F. is supported by Science Foundation Ireland. We would like to thank Kenneth Murphy, Department of Pathology & Immunology, Washington University School of Medicine in St. Louis, MO, USA, for providing the *Spic<sup>igfp/igfp</sup>* reporter mouse strain, and for discussing the results of the manuscript. We acknowledge A. Petrunina and colleagues in the Phenotyping Hub of the Department of Medicine (University of Cambridge) for their help in flow cytometry and sorting, and the Genomics and Transcriptomics Core and Bioinformatics and Biostatistics (Bio<sup>2</sup>) Core Facility of the Wellcome-MRC IMS-MRL for help in library preparation and support provided for data analysis, respectively. We thank Keith Burling at the Core Biochemical Assay Laboratory, Addenbrooke's Hospital, Cambridge, UK, for help in determination of IL-33 in plasma and red blood cell lysates. We thank Helen Killick, Translational Sciences and Experimental Medicine, Early Respiratory and Immunology, BioPharmaceuticals R&D, AstraZeneca, Cambridge, UK, for experimental support on detection of IL-33 in red blood cells.

### AUTHOR CONTRIBUTIONS

Y.L. was involved in all experiments. G.B. and D.C. performed and analyzed the RNA sequencing and ATAC sequencing experiments, and G.B. wrote corresponding sections in the manuscript. I.C.S. and E.S.C. performed and supervised experiments related to erythrocyte-associated IL-33. M.C., J.H., X.Y., S.A.N., X.L., and X.C. were involved in animal experimentation, flow cytometry, and data analysis. R.J. performed iron measurements. H.E.J., G.P., P.G.F., and A.N.J.M. generated and provided genetically altered mice for experiments. M.S. and G.H. provided spleens from IL-33-deficient rats. I.C.S., G.P., P.G.F., E.S.C., and A.N.J.M. reviewed the manuscript for important intellectual content. Z.M. supervised the study and wrote the manuscript.

### DECLARATION OF INTERESTS

Authors that are employees of the AstraZeneca Group (I.C.S. and E.S.C.) have stock/stock options in AstraZeneca. The other authors declare no conflict of interest.

Received: September 25, 2018

Revised: January 31, 2020

Accepted: March 13, 2020

Published: April 8, 2020

### REFERENCES

Akashi, K., Traver, D., Miyamoto, T., and Weissman, I.L. (2000). A clonogenic common myeloid progenitor that gives rise to all myeloid lineages. *Nature* *404*, 193–197.

Amit, I., Winter, D.R., and Jung, S. (2016). The role of the local environment and epigenetics in shaping macrophage identity and their effect on tissue homeostasis. *Nat. Immunol.* *17*, 18–25.

Andersson, P., Yang, Y., Hosaka, K., Zhang, Y., Fischer, C., Braun, H., Liu, S., Yu, G., Liu, S., Beyaert, R., et al. (2018). Molecular mechanisms of IL-33-mediated stromal interactions in cancer metastasis. *JCI Insight* *3*, <https://doi.org/10.1172/jci.insight.122375.30333314>.

Borges da Silva, H., Fonseca, R., Pereira, R.M., Cassado, Ados.A., Álvarez, J.M., and D'Império Lima, M.R. (2015). Splenic Macrophage Subsets and Their Function during Blood-Borne Infections. *Front. Immunol.* *6*, 480.

Bosurgi, L., Cao, Y.G., Cabeza-Cabrerizo, M., Tucci, A., Hughes, L.D., Kong, Y., Weinstein, J.S., Licona-Limon, P., Schmid, E.T., Pelorosso, F., et al. (2017). Macrophage function in tissue repair and remodeling requires IL-4 or IL-13 with apoptotic cells. *Science* *356*, 1072–1076.

Bresnick, E.H., Lee, H.Y., Fujiwara, T., Johnson, K.D., and Keles, S. (2010). GATA switches as developmental drivers. *J. Biol. Chem.* *285*, 31087–31093.

Butovsky, O., Jedrychowski, M.P., Moore, C.S., Cialic, R., Lanser, A.J., Gabriely, G., Koeglsperger, T., Dake, B., Wu, P.M., Doykan, C.E., et al. (2014). Identification of a unique TGF- $\beta$ -dependent molecular and functional signature in microglia. *Nat. Neurosci.* *17*, 131–143.

Cayrol, C., and Girard, J.P. (2018). Interleukin-33 (IL-33): A nuclear cytokine from the IL-1 family. *Immunol. Rev.* *281*, 154–168.

Cayrol, C., Duval, A., Schmitt, P., Roga, S., Camus, M., Stella, A., Burtlett-Schiltz, O., Gonzalez-de-Peredo, A., and Girard, J.P. (2018). Environmental allergens induce allergic inflammation through proteolytic maturation of IL-33. *Nat. Immunol.* *19*, 375–385.

Chou, S.T., Khandros, E., Bailey, L.C., Nichols, K.E., Vakoc, C.R., Yao, Y., Huang, Z., Crispino, J.D., Hardison, R.C., Blobel, G.A., and Weiss, M.J. (2009). Graded repression of PU.1/Sfpi1 gene transcription by GATA factors regulates hematopoietic cell fate. *Blood* *114*, 983–994.

Corces, M.R., Trevino, A.E., Hamilton, E.G., Greenside, P.G., Sinnott-Armstrong, N.A., Vesuna, S., Satpathy, A.T., Rubin, A.J., Montine, K.S., Wu, B., et al. (2017). An improved ATAC-seq protocol reduces background and enables interrogation of frozen tissues. *Nat. Methods* *14*, 959–962.

Enders, M., Franken, L., Philipp, M.S., Kessler, N., Baumgart, A.K., Eichler, M., Wiertz, E.J.H., Garbi, N., and Kurts, C. (2020). Splenic Red Pulp Macrophages Cross-Prime Early Effector CTL That Provide Rapid Defense against Viral Infections. *J. Immunol.* *204*, 87–100.

Gao, X., Johnson, K.D., Chang, Y.I., Boyer, M.E., Dewey, C.N., Zhang, J., and Bresnick, E.H. (2013). Gata2 cis-element is required for hematopoietic stem cell generation in the mammalian embryo. *J. Exp. Med.* *210*, 2833–2842.

Gautier, E.L., Ivanov, S., Williams, J.W., Huang, S.C., Marcelin, G., Fairfax, K., Wang, P.L., Francis, J.S., Leone, P., Wilson, D.B., et al. (2014). Gata6 regulates aspartoacylase expression in resident peritoneal macrophages and controls their survival. *J. Exp. Med.* *211*, 1525–1531.

Guilliams, M., De Kleer, I., Henri, S., Post, S., Vanhoutte, L., De Prijck, S., Deswarte, K., Malissen, B., Hammad, H., and Lambrecht, B.N. (2013). Alveolar macrophages develop from fetal monocytes that differentiate into long-lived cells in the first week of life via GM-CSF. *J. Exp. Med.* *210*, 1977–1992.

Haldar, M., Kohyama, M., So, A.Y., Kc, W., Wu, X., Briseño, C.G., Satpathy, A.T., Kretzer, N.M., Arase, H., Rajasekaran, N.S., et al. (2014). Heme-mediated SPI-C induction promotes monocyte differentiation into iron-recycling macrophages. *Cell* *156*, 1223–1234.

Hashimoto, D., Chow, A., Noizat, C., Teo, P., Beasley, M.B., Leboeuf, M., Becker, C.D., See, P., Price, J., Lucas, D., et al. (2013). Tissue-resident macrophages self-maintain locally throughout adult life with minimal contribution from circulating monocytes. *Immunity* *38*, 792–804.

Howangyin, K.Y., Zlatanova, I., Pinto, C., Ngkelo, A., Cochain, C., Rouanet, M., Vilar, J., Lemitre, M., Stockmann, C., Fleischmann, B.K., et al. (2016). Myeloid-Epithelial-Reproductive Receptor Tyrosine Kinase and Milk Fat Globule Epidermal Growth Factor 8 Coordinately Improve Remodeling After Myocardial Infarction via Local Delivery of Vascular Endothelial Growth Factor. *Circulation* *133*, 826–839.



- Ip, W.K.E., Hoshi, N., Shouval, D.S., Snapper, S., and Medzhitov, R. (2017). Anti-inflammatory effect of IL-10 mediated by metabolic reprogramming of macrophages. *Science* 356, 513–519.
- Jenkins, S.J., Ruckerl, D., Cook, P.C., Jones, L.H., Finkelman, F.D., van Rooijen, N., MacDonald, A.S., and Allen, J.E. (2011). Local macrophage proliferation, rather than recruitment from the blood, is a signature of TH2 inflammation. *Science* 332, 1284–1288.
- Johnson, K.D., Hsu, A.P., Ryu, M.J., Wang, J., Gao, X., Boyer, M.E., Liu, Y., Lee, Y., Calvo, K.R., Keles, S., et al. (2012). Cis-element mutated in GATA2-dependent immunodeficiency governs hematopoiesis and vascular integrity. *J. Clin. Invest.* 122, 3692–3704.
- Karsten, E., Breen, E., and Herbert, B.R. (2018). Red blood cells are dynamic reservoirs of cytokines. *Sci. Rep.* 8, 3101.
- Kearley, J., Silver, J.S., Sanden, C., Liu, Z., Berlin, A.A., White, N., Mori, M., Pham, T.H., Ward, C.K., Criner, G.J., et al. (2015). Cigarette smoke silences innate lymphoid cell function and facilitates an exacerbated type I interleukin-33-dependent response to infection. *Immunity* 42, 566–579.
- Kitajima, K., Tanaka, M., Zheng, J., Yen, H., Sato, A., Sugiyama, D., Umehara, H., Sakai, E., and Nakano, T. (2006). Redirecting differentiation of hematopoietic progenitors by a transcription factor, GATA-2. *Blood* 107, 1857–1863.
- Kiyomiya, H., Ariyoshi, W., Okinaga, T., Kaneuji, T., Mitsugi, S., Sakurai, T., Habu, M., Yoshioka, I., Tominaga, K., and Nishihara, T. (2015). IL-33 inhibits RANKL-induced osteoclast formation through the regulation of Blimp-1 and IRF-8 expression. *Biochem. Biophys. Res. Commun.* 460, 320–326.
- Koulnis, M., Pop, R., Porpiglia, E., Shearstone, J.R., Hidalgo, D., and Socolovsky, M. (2011). Identification and analysis of mouse erythroid progenitors using the CD71/TER119 flow-cytometric assay. *J. Vis. Exp.* 2011. <https://doi.org/10.3791/2809>.
- Kurotaki, D., Uede, T., and Tamura, T. (2015). Functions and development of red pulp macrophages. *Microbiol. Immunol.* 59, 55–62.
- Lefrançois, E., Duval, A., Mirey, E., Roga, S., Espinosa, E., Cayrol, C., and Girard, J.P. (2014). Central domain of IL-33 is cleaved by mast cell proteases for potent activation of group-2 innate lymphoid cells. *Proc. Natl. Acad. Sci. USA* 111, 15502–15507.
- Liew, F.Y., Girard, J.P., and Turnquist, H.R. (2016). Interleukin-33 in health and disease. *Nat. Rev. Immunol.* 16, 676–689.
- Ling, K.W., Ottersbach, K., van Hamburg, J.P., Oziemlak, A., Tsai, F.Y., Orkin, S.H., Ploemacher, R., Hendriks, R.W., and Dzierzak, E. (2004). GATA-2 plays two functionally distinct roles during the ontogeny of hematopoietic stem cells. *J. Exp. Med.* 200, 871–882.
- Linnemann, A.K., O'Geen, H., Keles, S., Farnham, P.J., and Bresnick, E.H. (2011). Genetic framework for GATA factor function in vascular biology. *Proc. Natl. Acad. Sci. USA* 108, 13641–13646.
- Lopez-Yrigoyen, M., Yang, C.T., Fidanza, A., Cassetta, L., Taylor, A.H., McCahill, A., Sellink, E., von Lindern, M., van den Akker, E., Mountford, J.C., et al. (2019). Genetic programming of macrophages generates an in vitro model for the human erythroid island niche. *Nat. Commun.* 10, 881.
- Ma, W., Noble, W.S., and Bailey, T.L. (2014). Motif-based analysis of large nucleotide data sets using MEME-ChIP. *Nat. Protoc.* 9, 1428–1450.
- Marampon, F., Bossi, G., Ciccarelli, C., Di Rocco, A., Sacchi, A., Pestell, R.G., and Zani, B.M. (2009). MEK/ERK inhibitor U0126 affects in vitro and in vivo growth of embryonal rhabdomyosarcoma. *Mol. Cancer Ther.* 8, 543–551.
- Mass, E., Ballesteros, I., Farlik, M., Halbritter, F., Günther, P., Crozet, L., Jacome-Galarza, C.E., Händler, K., Klughammer, J., Kobayashi, Y., et al. (2016). Specification of tissue-resident macrophages during organogenesis. *Science* 353, <https://doi.org/10.1126/science.aaf4238>.
- McLaren, J.E., Michael, D.R., Salter, R.C., Ashlin, T.G., Calder, C.J., Miller, A.M., Liew, F.Y., and Ramji, D.P. (2010). IL-33 reduces macrophage foam cell formation. *J. Immunol.* 185, 1222–1229.
- Minutti, C.M., Jackson-Jones, L.H., García-Fojeda, B., Knipper, J.A., Sutherland, T.E., Logan, N., Ringqvist, E., Guillamat-Prats, R., Ferenbach, D.A., Artigas, A., et al. (2017). Local amplifiers of IL-4R $\alpha$ -mediated macrophage activation promote repair in lung and liver. *Science* 356, 1076–1080.
- Nandakumar, S.K., Johnson, K., Throm, S.L., Pestina, T.I., Neale, G., and Persons, D.A. (2015). Low-level GATA2 overexpression promotes myeloid progenitor self-renewal and blocks lymphoid differentiation in mice. *Exp. Hematol.* 43, 565–577.e1-10.
- Okabe, Y., and Medzhitov, R. (2014). Tissue-specific signals control reversible program of localization and functional polarization of macrophages. *Cell* 157, 832–844.
- Pinto, S.M., Nirujogi, R.S., Rojas, P.L., Patil, A.H., Manda, S.S., Subbannayya, Y., Roa, J.C., Chatterjee, A., Prasad, T.S., and Pandey, A. (2015). Quantitative phosphoproteomic analysis of IL-33-mediated signaling. *Proteomics* 15, 532–544.
- Scott, C.L., Zheng, F., De Baetselier, P., Martens, L., Saeys, Y., De Prijck, S., Lippens, S., Abels, C., Schoonooghe, S., Raes, G., et al. (2016). Bone marrow-derived monocytes give rise to self-renewing and fully differentiated Kupffer cells. *Nat. Commun.* 7, 10321.
- Scott, I.C., Majithiya, J.B., Sanden, C., Thornton, P., Sanders, P.N., Moore, T., Guscott, M., Corkill, D.J., Erjefält, J.S., and Cohen, E.S. (2018a). Interleukin-33 is activated by allergen- and necrosis-associated proteolytic activities to regulate its alarmin activity during epithelial damage. *Sci. Rep.* 8, 3363.
- Scott, I.C., Rees, D.G., and Cohen, E.S. (2018b). New perspectives on IL-33 and IL-1 family cytokines as innate environmental sensors. *Biochem. Soc. Trans.* 46, 1345–1353.
- Takeda, T., Unno, H., Morita, H., Futamura, K., Emi-Sugie, M., Arae, K., Shoda, T., Okada, N., Igarashi, A., Inoue, E., et al. (2016). Platelets constitutively express IL-33 protein and modulate eosinophilic airway inflammation. *J. Allergy Clin. Immunol.* 138, 1395–1403.e6.
- Tanimura, N., Miller, E., Igarashi, K., Yang, D., Burstyn, J.N., Dewey, C.N., and Bresnick, E.H. (2016). Mechanism governing heme synthesis reveals a GATA factor/home circuit that controls differentiation. *EMBO Rep.* 17, 249–265.
- Theurl, I., Hilgendorf, I., Nairz, M., Tymoszuk, P., Haschka, D., Asshoff, M., He, S., Gerhardt, L.M., Holderried, T.A., Seifert, M., et al. (2016). On-demand erythrocyte disposal and iron recycling requires transient macrophages in the liver. *Nat. Med.* 22, 945–951.
- Vainchtein, I.D., Chin, G., Cho, F.S., Kelley, K.W., Miller, J.G., Chien, E.C., Liddelov, S.A., Nguyen, P.T., Nakao-Inoue, H., Dorman, L.C., et al. (2018). Astrocyte-derived interleukin-33 promotes microglial synapse engulfment and neural circuit development. *Science* 359, 1269–1273.
- Velickovic, M., Pejnovic, N., Mitrovic, S., Radosavljevic, G., Jovanovic, I., Kanjevac, T., Jovicic, N., and Lukic, A. (2015). ST2 deletion increases inflammatory bone destruction in experimentally induced periapical lesions in mice. *J. Endod.* 41, 369–375.
- Wang, Y., Szretter, K.J., Vermi, W., Gilfillan, S., Rossini, C., Cella, M., Barrow, A.D., Diamond, M.S., and Colonna, M. (2012). IL-34 is a tissue-restricted ligand of CSF1R required for the development of Langerhans cells and microglia. *Nat. Immunol.* 13, 753–760.
- Wei, J., Zhao, J., Schrott, V., Zhang, Y., Gladwin, M., Bullock, G., and Zhao, Y. (2015). Red Blood Cells Store and Release Interleukin-33. *J. Investig. Med.* 63, 806–810.
- Xiao, X., Yeoh, B.S., and Vijay-Kumar, M. (2017). Lipocalin 2: An Emerging Player in Iron Homeostasis and Inflammation. *Annu. Rev. Nutr.* 37, 103–130.
- Zaiss, M.M., Kurowska-Stolarska, M., Böhm, C., Gary, R., Scholtyssek, C., Stolarski, B., Reilly, J., Kerr, S., Millar, N.L., Kamradt, T., et al. (2011). IL-33 shifts the balance from osteoclast to alternatively activated macrophage differentiation and protects from TNF- $\alpha$ -mediated bone loss. *J. Immunol.* 186, 6097–6105.



STAR★METHODS

KEY RESOURCES TABLE

| REAGENT or RESOURCE                                   | SOURCE          | IDENTIFIER                                    |
|-------------------------------------------------------|-----------------|-----------------------------------------------|
| <b>Antibodies</b>                                     |                 |                                               |
| Zombie Aqua Fixable Viability Kit                     | Thermo Fisher   | Catalog number: L34965                        |
| Alexa Flour 700 anti-mouse CD11b                      | BD Bioscience   | Catalog number: 557960; RRID: AB_396960       |
| PE/Cy7 anti-mouse CD11c                               | BioLegend       | Catalog number: 117317; RRID: AB_493569       |
| Brilliant Violet 421 anti-mouse F4/80                 | BioLegend       | Catalog number: 123131; RRID: AB_10901171     |
| APC-eFluor 780 anti-mouse Ly6C                        | Thermo Fisher   | Catalog number: 47-5932-82; RRID: AB_2573992  |
| PerCP/Cy5.5 anti-mouse Ly-6G                          | BioLegend       | Catalog number: 127653; RRID: AB_2616998      |
| Brilliant Violet 650 anti-mouse NK-1.1                | BioLegend       | Catalog number: 108735; RRID: AB_11147949     |
| Brilliant Violet 605 anti-mouse CD335                 | BioLegend       | Catalog number: 137619; RRID: AB_2562452      |
| FITC anti-mouse CD169                                 | BioLegend       | Catalog number: 142405; RRID: AB_2563106      |
| APC anti-mouse CD209b                                 | Thermo Fisher   | Catalog number: 17-2093-82; RRID: AB_11151692 |
| FITC anti-mouse T1/IL1RL1 (ST2)                       | MD Biosciences  | Catalog number: 101001; RRID: AB_947549       |
| FITC anti-mouse Ter119                                | BioLegend       | Catalog number: 116205; RRID: AB_313706       |
| PE-anti-mouse CD71                                    | BioLegend       | Catalog number: 113807; RRID: AB_313568       |
| APC anti-mouse DYKDDDDK                               | BioLegend       | Catalog number: 637307; RRID: AB_2561496      |
| Brilliant Violet 570 anti-mouse CD45.1                | BioLegend       | Catalog number: 110733; RRID: AB_10895765     |
| Brilliant Violet 785 anti-mouse CD45.2                | BioLegend       | Catalog number: 109839; RRID: AB_2562604      |
| APC anti-mouse CD45                                   | BioLegend       | Catalog number: 103111; RRID: AB_312976       |
| anti-mouse IL-33 antibody                             | R&D systems     | Catalog number: AF3626; RRID: AB_884269       |
| anti-human IL-33 antibody                             | R&D systems     | Catalog number: AF3625; RRID: AB_1151900      |
| anti-human IL-33 antibody                             | BioRad          | Catalog number: AHP1482; RRID: AB_2124144     |
| anti-human IL-33 antibody                             | BioRad          | Catalog number: AHP1626; RRID: AB_2124143     |
| p44/42 MAPK (Erk1/2) Antibody                         | Cell Signaling  | Catalog number: 9102; RRID: AB_330744         |
| Phospho-p44/42 MAPK (Erk1/2) (Thr202/Tyr204) antibody | Cell Signaling  | Catalog number: 9101; RRID: AB_331646         |
| Phospho-NF- $\kappa$ B p65 antibody                   | Cell Signaling  | Catalog number: 3033; RRID: AB_331284         |
| anti-CD235a (Glycophorin A) MicroBeads, human         | Miltenyi Biotec | Catalog number: 130-050-501                   |
| anti-Ter-119 MicroBeads, mouse                        | Miltenyi Biotec | Catalog number: 130-049-901                   |
| <b>Chemicals, Peptides, and Recombinant Proteins</b>  |                 |                                               |
| Hemin                                                 | Sigma           | Catalog number: 51280                         |
| U0126                                                 | Sigma           | Catalog number: 662005                        |
| Recombinant Mouse IL-33 (carrier-free)                | BioLegend       | Catalog number: 580502                        |
| Recombinant Human IL-33 (carrier-free)                | BioLegend       | Catalog number: 581802                        |
| Soluble IL1RL1 (ST2)                                  | AstraZeneca     | Catalog number: N/A                           |
| Murine IgG1                                           | AstraZeneca     | Catalog number: N/A                           |
| Recombinant Mouse M-CSF (carrier-free)                | BioLegend       | Catalog number: 576402                        |
| Recombinant Human M-CSF (carrier-free)                | BioLegend       | Catalog number: 574802                        |
| Tn5 transposase                                       | illumina        | Catalog number: 15027865                      |
| Transposase buffer                                    | illumina        | Catalog number: 15027866                      |
| AMPure XP beads                                       | Beckman Coulter | Catalog number: A63880                        |

(Continued on next page)

| REAGENT or RESOURCE                                  | SOURCE                                                                                                                                            | IDENTIFIER                |
|------------------------------------------------------|---------------------------------------------------------------------------------------------------------------------------------------------------|---------------------------|
| <b>Continued</b>                                     |                                                                                                                                                   |                           |
| Critical Commercial Assays                           |                                                                                                                                                   |                           |
| Human Phospho-Kinase Array Kit                       | R&D systems                                                                                                                                       | Catalog number: ARY003B   |
| PKH26 Red Fluorescent Cell Linker Kits               | Sigma                                                                                                                                             | Catalog number: MINI26    |
| V-PLEX Plus Mouse IL-33 Kit                          | MesoScale Discovery                                                                                                                               | Catalog number: K152XBD-1 |
| Human IL-33 DuoSet ELISA kit                         | R&D systems                                                                                                                                       | Catalog number: DY3625    |
| SMARTer stranded total RNA-Seq v2 kit                | Takara                                                                                                                                            | Catalog number: 634412    |
| RNEasy plus micro kit                                | Qiagen                                                                                                                                            | Catalog number: 74034     |
| Minelute PCR purification cleanup kit                | Qiagen                                                                                                                                            | Catalog number: 28004     |
| Tools                                                |                                                                                                                                                   |                           |
| STAR 2.5.1                                           | <a href="https://github.com/alexdobin/STAR/releases/tag/2.5.1b">https://github.com/alexdobin/STAR/releases/tag/2.5.1b</a>                         | RRID: SCR_015899          |
| cutadapt 2.5                                         | <a href="https://pypi.org/project/cutadapt/2.5/">https://pypi.org/project/cutadapt/2.5/</a>                                                       | RRID: SCR_011841          |
| Python 3.6.2                                         |                                                                                                                                                   | RRID: SCR_008394          |
| Subread-Feature Counts 1.6.2                         | <a href="https://sourceforge.net/projects/subread/files/subread-1.6.2/">https://sourceforge.net/projects/subread/files/subread-1.6.2/</a>         | RRID: SCR_009803          |
| DESeq2 1.25.9                                        | <a href="http://bioconductor.org/packages/release/bioc/html/DESeq2.html">http://bioconductor.org/packages/release/bioc/html/DESeq2.html</a>       | RRID: SCR_015687          |
| heatmap.2 function from the R Package gplots 3.0.1.1 | <a href="https://cran.r-project.org/src/contrib/Archive/gplots/">https://cran.r-project.org/src/contrib/Archive/gplots/</a>                       | N/A                       |
| Ingenuity Systems Pathway analysis software          | Qiagen                                                                                                                                            | RRID: SCR_008653          |
| TrimGalore                                           | <a href="https://github.com/FelixKrueger/TrimGalore/releases/tag/0.6.4">https://github.com/FelixKrueger/TrimGalore/releases/tag/0.6.4</a>         | RRID: SCR_011847          |
| Bowtie2                                              | <a href="https://sourceforge.net/projects/bowtie-bio/files/bowtie2/2.3.5.1">https://sourceforge.net/projects/bowtie-bio/files/bowtie2/2.3.5.1</a> | RRID: SCR_005476          |
| Genrich                                              | <a href="https://github.com/jsh58/Genrich#quick">https://github.com/jsh58/Genrich#quick</a>                                                       | N/A                       |
| BEDtools 2.29.0                                      | <a href="https://github.com/arq5x/bedtools2/releases/tag/v2.29.0">https://github.com/arq5x/bedtools2/releases/tag/v2.29.0</a>                     | RRID: SCR_006646          |
| Meme-Chip                                            | <a href="http://meme-suite.org/index.html">http://meme-suite.org/index.html</a>                                                                   | RRID: SCR_001783          |
| Data deposition                                      |                                                                                                                                                   |                           |
| Sequencing data                                      | GEO                                                                                                                                               | GSE146782                 |

## LEAD CONTACT AND MATERIALS AVAILABILITY

Lead author: Ziad Mallat, [zm255@medschl.cam.ac.uk](mailto:zm255@medschl.cam.ac.uk). Methods, including statements of data availability and any associated additional references are available in the online version of the paper.

## EXPERIMENTAL MODEL AND SUBJECT DETAILS

### Mice

All experiments were approved by the Home Office, UK. C57/B16 *Spic<sup>igfp/igfp</sup>* reporter mice were kindly provided by Kenneth M. Murphy (Washington University, St Louis), BALB/c background of *Il1r1<sup>-/-</sup>* and *Il33<sup>-/-</sup>* were from Andrew McKenzie and C57/B16 background of *Il1r1<sup>-/-</sup>* were from Padraic Fallon, C57/B16 *Myd88<sup>-/-</sup>* mice were from Bernhard Ryffel and C57/B16 CD45.1 mice were originally from Jackson Labs. For the hemin (500 µg/200 µl) and IL-33 (1 µg/200 µl) *in vivo* experiment, the mice were injected intra-peritoneally once a day for 3 days. Control mice received PBS (200 µl) injections. For the ERK1/2 *in vivo* experiment, C57/B16 *Spic<sup>igfp/igfp</sup>* reporter mice were treated with the MEK inhibitor U0126 or DMSO control 3 times per week for 6 weeks. U0126 solution was prepared in DMSO as previously described (Marampon et al., 2009). Two hundred microliters 50 µmol/kg were injected intra-peritoneally into each mouse. For the soluble IL1RL1 (ST2) *in vivo* experiment, C57/B16 *Spic<sup>igfp/igfp</sup>* reporter mice were treated with soluble IL1RL1 or murine IgG1 control 200 µg/mouse 3 times per week for 6 weeks.

To reconstitute *Il33<sup>-/-</sup>* mice with erythrocyte-associated IL-33, *Il33<sup>-/-</sup>* mice received once a day for 3 days i.v. injections (200 µl) of  $2 \times 10^9$  erythrocytes from either WT or *Il33<sup>-/-</sup>* mice.

## METHOD DETAILS

### Hemin preparation

Hemin was purchased from Sigma-Aldrich (51280, Sigma), and a stock solution was prepared at 25mg/mL in 0.15M NaCl containing 10% NH<sub>4</sub>OH and stored at -20°C. Hemin was used at a final concentration of 40μM for cell culture experiments and 500 μg/200 μL sterile 0.15M NaCl for i.p. injections *in vivo*, as previously described (Haldar et al., 2014).

### Bone marrow transplants

CD45.1 mice were maintained overnight with Baytril before irradiation with two doses of 5.5 Gy (separated by 4 h) followed by reconstitution with 10<sup>7</sup> bone marrow cells obtained from CD45.2 WT or *Il1rl1*<sup>-/-</sup> mice. Donor-derived cells in spleen or liver (CD45.2<sup>+</sup>) were analyzed 10 weeks after transfer using flow cytometry. In other experiments, CD45.2 mice were lethally irradiated and injected intravenously (i.v.) with 10<sup>7</sup> bone marrow cells containing 50% of CD45.2 WT or *Il1rl1*<sup>-/-</sup> mice and 50% of CD45.1 mice.

### Spleen, liver and serum iron analysis

Samples of the spleen (20-60 mg) and liver (40-90 mg) were digested (1 in 10) in 16% nitric acid, prepared by diluting a stock solution of high purity nitric acid (65% w/v p.a. plus; Sigma-Aldrich) with ultra-high purity water, in acid-cleaned 15 mL PTFE vials in an Ultra-Wave Single Reaction Chamber Microwave Digestion System (Milestone Srl; Sorisole, Italy). The following digestion conditions were followed: 5 min ramp to 120°C, then 10 min ramp from 120°C to 230°C and maintained at 230°C for 15 min. Blank samples, containing just the acid mixture, were similarly prepared to check for background Fe contributions.

Digested samples were analyzed for total Fe by inductively coupled plasma optical emission spectrometry (Jobin Yvon Horiba Ultima 2C; Instrument SA, Longjumeau, France), equipped with a concentric micro-nebulizer and cyclonic spray chamber. A sample introduction pump speed of 10 rates/min, nebulizer flow rate of 0.72 mL/min and a plasma gas flow rate of 10 L/min was used with low-flow sample tubing. The 259.940 nm analytical line for Fe was used. All samples, including blank samples, were analyzed in a single batch with acid-based Fe standards (0-40 mg/L). Each sample was analyzed in triplicate and the average value was used. For serum measurements, 20 μL of serum was incubated with 20 μL of acid reagent for 5 min. Supernatant was mixed with 40 μL chromagen reagent, and absorbance at 535 nm was measured as described above.

### Histochemical analysis

For Perl's Prussian blue stain, tissues were fixed with 4% paraformaldehyde in 0.1 M phosphate buffer (pH 7.0), embedded in paraffin, and stained with Perl's Prussian blue and pararosaniline (Sigma).

### Differentiation of bone marrow-derived macrophages

Fresh bone marrow cells were used to generate BMDM. Cells were resuspended in 10 mL bone marrow differentiation media (RPMI1640 supplemented with 10% fetal bovine serum (GIBCO, cat. 12657-029), 100 U/mL penicillin, 100 μg/mL streptomycin, 2 mM L-glutamine and 20ng/mL of M-CSF(BioLegend)). Cells were seeded in Petri dishes (Corning Brand) and incubated at 37°C in a 5% CO<sub>2</sub> atmosphere. Four days after seeding, an extra 10 mL of fresh differentiation media were added per plate and incubated for an additional 3 days.

### Flow cytometry

Single-cell suspensions of bone marrow, spleen and liver were incubated with Fc block solution (eBioscience, clone 93), dilution of 1:200 in flow buffer (PBS, 1% BSA, 2 mM EDTA, 0.01% Na<sub>3</sub>N) for 10 min at 4°C. Cells were then stained with fluorophore-conjugated antibodies, dilution of 1:200 in flow buffer for 30 min at 4°C, prior to extensive wash and analyzed using an LSRII Fortessa (BD) flow cytometer. The following antibodies were used in the experiments, Zombie Aqua Fixable Viability Kit, Alexa Flour 700 anti-mouse CD11b (BD Bioscience MI170), PE/Cy7 anti-mouse CD11c (BioLegend N418), Brilliant Violet 421 anti-mouse F4/80 (BioLegend BM8), APC-eFluor 780 anti-mouse Ly6C (eBioscience HK1.4), PerCP/Cy5.5 anti-mouse Ly-6G (BioLegend 1A8), Brilliant Violet 650 anti-mouse NK-1.1 (BioLegend PK136), Brilliant Violet 605 anti-mouse CD335 (BioLegend 29A1.4), FITC anti-mouse CD169 (BioLegend 3D6.112), APC anti-mouse CD209b (eBioscience eBio22D1), FITC anti-mouse T1/IL1RL1 (ST2) (mdblproducts DJ8), FITC anti-mouse Ter119 (BioLegend Ter119), PE anti-mouse CD71 (BioLegend R17217), APC anti-mouse DYKDDDDK (BioLegend L5), Brilliant Violet 570 anti-mouse CD45.1 (BioLegend A20) and Brilliant Violet 785 anti-mouse CD45.2 (BioLegend 104), APC anti-mouse CD45 (BioLegend 30-F11). Cell analysis was done using BD FACSDiva v8.01 Software and figure displayed dot plots and histograms were obtained using FlowJo v10.5 software (FlowJo, LLC).

### Cytokine quantification

We used MesoScale Discovery IL-33 V-Plex assay kit (product code K152XBD-1) and human IL-33 Duoset ELISA kit (DY3625, R&D systems) according to manufacturer's instructions. Measurements were performed blindly by the Core Biochemical Assay lab at Addenbrookes Hospital, the University of Cambridge, Cambridge, UK.

### Quantitative RT-PCR

For gene expression analysis, RNA from sorted RPM, Pre-RPM and Monocytes were isolated using an RNeasy mini kit (QIAGEN). RT-PCR was performed using a QuantiTect Reverse Transcription kit (QIAGEN). Real-time PCR was performed on 5  $\mu$ L cDNA product (diluted 10 to 20 times) using SYBR Green qPCR mix (Eurogentec) on a Roche Lightcycler. Primer sequences are: human *SPIC* forward 5'-ACGGTAATTAACAGTGCTGCG-3' and reverse 5'-GCTGGAGAAGAGTGGGTTGT-3', human *HMOX1* forward 5'-TAGAAGAGGCCAAGACTGCG-3' and reverse 5'-GGGCAGAATCTTGCACTTTGTT-3', human *TREML4* forward 5'-AGACCAGGAAATCAA GAGCCC-3' and reverse 5'-AAACCTCGTCACTGCTGTCC-3', human *VCAM1* forward 5'-GTTTGCAGCTTCTCAAGCTTTT-3' and reverse 5'-AGATGTGGTCCCCTCATTCG -3', human *LCN2* forward 5'-GCCCTGAAATCATGCCCTA-3' and reverse 5'-TCCCCTGGAATTGGTTGTCC-3', human *BACH1* forward 5'-TCGCGTAAGAAAAGCCGAG-3' and reverse 5'-CATCAACCAT ATTGTGCGAGGC-3', human *IL1RL1* forward 5'-CCCTCTGTCTTTCAGTTTGGTTGA-3' and reverse 5'-ACGACAGTGAAGGTCAC CAC-3'. Mouse *Spic* forward 5'-ACTGGAGAGGTGTAACAAATGGT-3' and reverse 5'-CAAACAGCCGAAGCTTTCTCC-3', mouse *Trem14* forward 5'-AAGCACAGCCACCATCTTTATG-3' and reverse 5'-GCACACAGAAAAGTACAGCA-3', mouse *Bach1* forward 5'-CTCTGAGACGGACACGGAAG-3' and reverse 5'-CCTTCTGCGGATGTCATGGA-3', mouse *Itgam* (Cd11b) forward 5'-GTGAG GTCTAAGACAGAGACCAA-3' and reverse 5'-TGCCGCTGAAAAAGCCAAG-3', mouse *Hmox1* forward, 5'-GCTAGCCTGGTGCAA GATACT-3' and reverse 5'-TGGGGGCCAGTATTGCATTT-3', mouse *Il1rl1* forward 5'-CCAGCCCTTCATCTGGGTATC-3' and reverse 5'-TGGCAATGGCACAGGATAGT-3', mouse *Lcn2* forward 5'-CTGTCCCAATCGACCAGTGT-3' and reverse 5'-CCAGC TCCCTCAATGGTGT-3', mouse *Adgre1* (F4/80) forward 5'-AATCGCTGCTGGTTGAATACAG-3' and reverse 5'-CCAGGCAAGGAG GACAGAGTT-3', mouse *Vcam1* forward 5'-CCGGCATATACGAGTGTGAA-3' and reverse 5'-GATGCGCAGTAGAGTGCAAG-3'.

These experiments were independently repeated three times and each treatment consisted of triplicate samples.

### PKH26-staining of Mouse RBCs and analysis of PKH26-stained cells

Anti-mouse CD47 Fab antibody treated RBCs were stained with PKH26 (Sigma) according to the manufacturer's protocol. Briefly, 250  $\mu$ L of RBCs were mixed with 2.25 mL diluent C from the PKH26 cell linker kit and incubated with 2  $\mu$ M PKH26 dye for 5 min at room temperature. The staining reaction was stopped by the addition of 2.5 mL FBS for 1 min, followed by further dilution with 5 mL PBS. Cells were then washed three times with PBS and resuspended at  $1 \times 10^{10}/200 \mu$ L for intravenous injection. 24 h after i.v. injection, spleens were collected and single-cell suspensions were prepared by mechanical disruption. Following incubation in Fc block, splenocytes were labeled with antibodies against Ly6G, CD11b and F4/80 and analyzed by flow cytometry (Fortessa) for PKH26+ cells in splenic monocytes (CD11b<sup>hi</sup> F4/80<sup>-</sup>) or pre-RPM (CD11b<sup>hi</sup> F4/80<sup>lo</sup>) or RPM (CD11b<sup>lo/-</sup> F4/80<sup>hi</sup>) or neutrophil (Ly6G<sup>hi</sup>CD11b<sup>+</sup>) population.

### Crude RBC lysates preparation

Human or mouse whole blood was collected in EDTA-treated blood collection tubes, followed by centrifugation at 400 g for 10 min. The RBC were transferred to new tubes and washed twice in PBS. The samples were incubated with RBC lysis buffer at room temperature for 10 min. After centrifugation at 13,000 g for 15 min at 4°C, the supernatants were passed through Amicon ultra (50 kDa) cutoff filter to remove haemoglobin (64 kDa), followed by a centrifugation at 7,000 g for 20 min at 4°C.

### Enriched human RBC lysates preparation

The positive selection of human erythrocytes from fresh human whole blood was performed using anti-CD235a (Glycophorin A)-conjugated microbeads and MACS LS columns (Miltenyi Biotec) according to manufacturer's instructions. Enriched erythrocyte preparations (2e8 cells/mL) were lysed in PBS/0.1% Triton X-100 at 4°C and lysates snap frozen on dry ice.

### SDS-PAGE and western blot analysis

Samples were analyzed by SDS-PAGE on NuPAGE Novex 4%–12% or 12% Bis-Tris mini gels (Invitrogen) with MOPS running buffer (Invitrogen) according to manufacturer's instructions under reducing conditions. All samples were reduced by heating to 95°C for 3 min in SDS-PAGE buffer containing 2% beta-mercaptoethanol. Proteins were transferred to nitrocellulose membranes (Invitrogen) and detected by western blotting. IL-33 was detected with an anti-mouse IL-33 antibody (R&D systems AF3626) and anti-human IL-33 antibodies (R&D systems AF3625 and BioRad AHP1482, AHP1626). Immunoreactive proteins were identified with HRP-conjugated secondary antibodies (R&D systems HAF008, 005 and 109) and Supersignal West Femto substrate (Pierce 34095) and visualized on LI-COR cDigit.

### RNA-sequencing analysis in splenocytes

RNA was extracted from freshly sorted splenic monocytes, pre-RPM and RPM, using the RNeasy plus micro kit (QIAGEN). RNA libraries were prepared using the SMARTer stranded total RNA-Seq v2 kit (Takara) and sequenced using Illumina NovaSeq (2x50bp), obtaining approximately 20 million reads per sample.

### ATAC-sequencing analysis in splenocytes

ATAC-seq was performed according to the published Omni-ATAC protocol (Corces et al., 2017). Briefly, nuclei were purified from  $5 \times 10^4$  freshly sorted splenic monocytes, pre-RPM and RPM. Transposition reactions were performed in 50  $\mu$ L using Tn5 transposase (Illumina) for 30 min at 37°C. Libraries were prepared using the recommended Nextera barcodes (Corces et al., 2017) and the number

of PCR amplification cycles was determined empirically as the number of cycles required to generate 25% of the maximum of a 5  $\mu$ L aliquot, as recommended (Corces et al., 2017). Libraries were cleaned up using the Minelute PCR purification cleanup kit (QIAGEN) followed by AMPure XP beads (Beckman Coulter) and quantified using quantitative PCR (Kapa Biosystems). 5nM libraries were multiplexed and sequenced using Illumina NovaSeq (2x50bp), obtaining approximately 80 million reads per barcoded sample.

#### Differential gene expression (DGE) analysis

Reads were mapped to Ensembl/GRCm38.95 using STAR (v2.5.1) (<https://github.com/alexdobin/STAR/releases/tag/2.5.1b>) with default parameters, trimmed with cutadapt 2.5 (<https://pypi.org/project/cutadapt/2.5/>) under Python 3.6.2 (parameters: `--nextseq-trim = 20 -m 15` for the R1 reads and `--nextseq-trim = 20 -m 15 -u 3` for the R2 reads) and counted using Subread-Feature Counts (v1.6.2) (<https://sourceforge.net/projects/subread/files/subread-1.6.2/>). DGE analysis was performed using DESeq2 (v1.25.9) (<http://bioconductor.org/packages/release/bioc/html/DESeq2.html>). Heatmaps were generated using the heatmap.2 function from the R Package gplots version 3.0.1.1 (<https://cran.r-project.org/src/contrib/Archive/gplots/>). Lists of differentially expressed genes were submitted to Pathway analysis using Ingenuity Systems Pathway analysis software (QIAGEN).

#### ATAC peak calling & Meme

Reads were quality trimmed using TrimGalore (<https://github.com/FelixKrueger/TrimGalore/releases/tag/0.6.4>) with a quality Phred score cutoff of 20 and a minimum required sequence length for both reads before a sequence pair gets removed set to 20 bp. Trimmed reads were mapped to Ensembl/GRCm38.95 using Bowtie2 (<https://sourceforge.net/projects/bowtie-bio/files/bowtie2/2.3.5.1/>) with standard parameters. Peaks were called using Genrich (<https://github.com/jsh58/Genrich#quick>) and excluding mitochondrial reads. Differential peak analysis was performed using BEDtools 2.29.0 (<https://github.com/arq5x/bedtools2/releases/tag/v2.29.0>). Motif enrichment was performed using Meme-Chip (Ma et al., 2014) with default parameters.

#### QUANTIFICATION AND STATISTICAL ANALYSIS

Data are represented as mean  $\pm$  SEM. Differences between values were examined using the parametric two-tailed unpaired Student's t test or two-way ANOVA.

#### DATA AND CODE AVAILABILITY

All sequencing data have been deposited in the National Centre for Biotechnology Information Gene Expression Omnibus (GEO). The accession number for the sequencing data reported in this paper is GEO: GSE146782. All other relevant data and scripts are available on request.



**Immunity, Volume 52**

**Supplemental Information**

**Interleukin-33 Signaling Controls**

**the Development of Iron-Recycling Macrophages**

**Yuning Lu, Gemma Basatemur, Ian C. Scott, Davide Chiarugi, Marc Clement, James Harrison, Ravin Jugdaohsingh, Xian Yu, Stephen A. Newland, Helen E. Jolin, Xuan Li, Xiao Chen, Monika Szymanska, Guttorm Haraldsen, Gaby Palmer, Padraic G. Fallon, E. Suzanne Cohen, Andrew N.J. McKenzie, and Ziad Mallat**

**Figure S1**

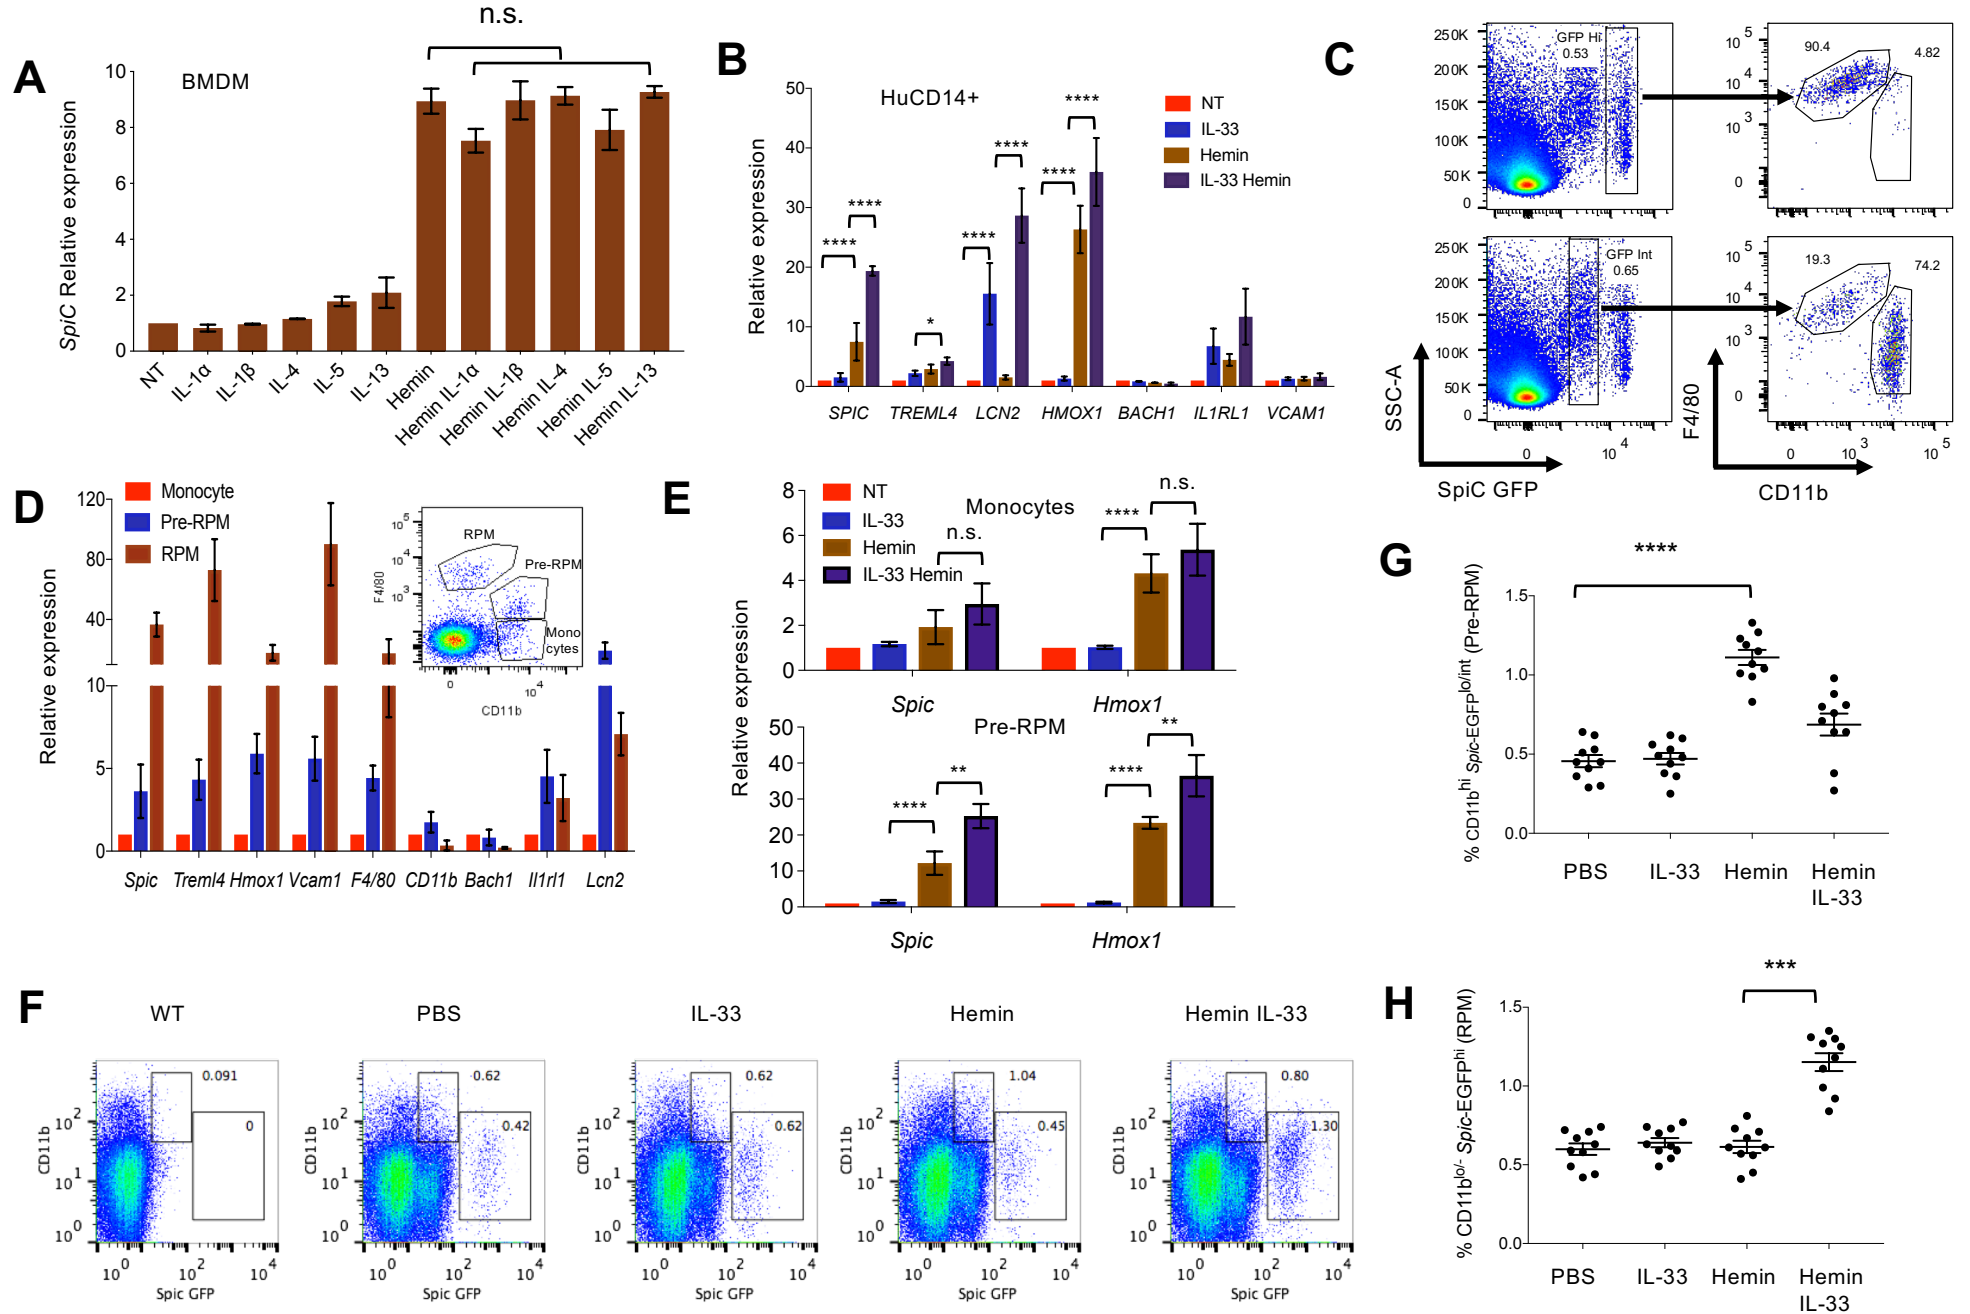

**Figure S1 related to Figure 1. IL-33 up-regulates hemin-induced *Spic* expression and promotes the development of a red pulp macrophage (RPM) phenotype *in vitro* and *in vivo*.** **A**, *Spic* mRNA expression in mouse bone marrow-derived (BMDM) macrophages stimulated *in vitro* for 4 days with individual cytokines (10ng/mL), hemin (40 $\mu$ M), or a combination of hemin and individual cytokines, compared to no treatment (NT). Data are representative of 3 independent experiments. **B**, Human macrophages were developed in culture from isolated blood CD14<sup>+</sup> monocytes (HuCD14<sup>+</sup>) and were treated *in vitro* for 4 days with hemin, IL-33, or a combination of hemin + IL-33, and were assessed for mRNA expression of *Spic* and other typical red pulp macrophage-associated genes, including *Trem14*, *Lcn2*, *Hmox1*, *Il1r11* and *Vcam1*. Data are representative of 3 independent experiments. **C**, Representative examples of flow cytometry staining for *Spic*-EGFP, CD11b and F4/80 in splenocytes of C57/Bl6 *Spic<sup>igfp/igfp</sup>* reporter mice. Splenic RPM are CD11b<sup>lo/-</sup> F4/80<sup>hi</sup> *Spic*-EGFP<sup>hi</sup>, whereas most *Spic*-EGFP<sup>int</sup> cells are CD11b<sup>hi</sup> F4/80<sup>lo/-</sup> pre-RPM and monocytes. Data are representative of more than 3 independent experiments. **D**, Splenic monocytes (CD11b<sup>hi</sup> F4/80<sup>-</sup>), pre-RPM (CD11b<sup>hi</sup> F4/80<sup>lo</sup>) and RPM (CD11b<sup>lo/-</sup> F4/80<sup>hi</sup>) were cell-sorted by flow cytometry and were assessed for mRNA expression of *Spic* and other typical RPM-associated genes. Data are representative of 3 pooled mice per group. **E**, Cell-sorted (flow cytometry) splenic monocytes (CD11b<sup>hi</sup> F4/80<sup>-</sup>) and pre-RPM (CD11b<sup>hi</sup> F4/80<sup>lo</sup>) were treated *in vitro* for 4 days with hemin (40  $\mu$ M), IL-33 (10 ng/mL), or a combination of hemin + IL-33, and compared to untreated cells for the expression of *Spic* and *Hmox1*. Data are representative of 3 pooled mice per group. **F**, C57/Bl6 *Spic<sup>igfp/igfp</sup>* reporter mice were injected intraperitoneally once a day for 4 days with either phosphate buffered saline (PBS), IL-33 (1 $\mu$ g), hemin (500 $\mu$ g), or IL-33 + hemin, and spleens were assayed by flow cytometry for splenic RPM (CD11b<sup>lo/-</sup> *Spic*-EGFP<sup>hi</sup>) and pre-RPM (CD11b<sup>hi</sup> *Spic*-EGFP<sup>lo/int</sup>). Quantification of **(G)** pre-RPM and **(H)** RPM (percentages among CD11c<sup>low</sup> Ly6G<sup>low</sup> NK1.1<sup>low</sup> SSC-A<sup>low</sup> cells). Each dot in **G** and **H** represents a separate mouse. \*\*\*\*P<0.0001; \*\*\*P<0.001.

**Figure S2**

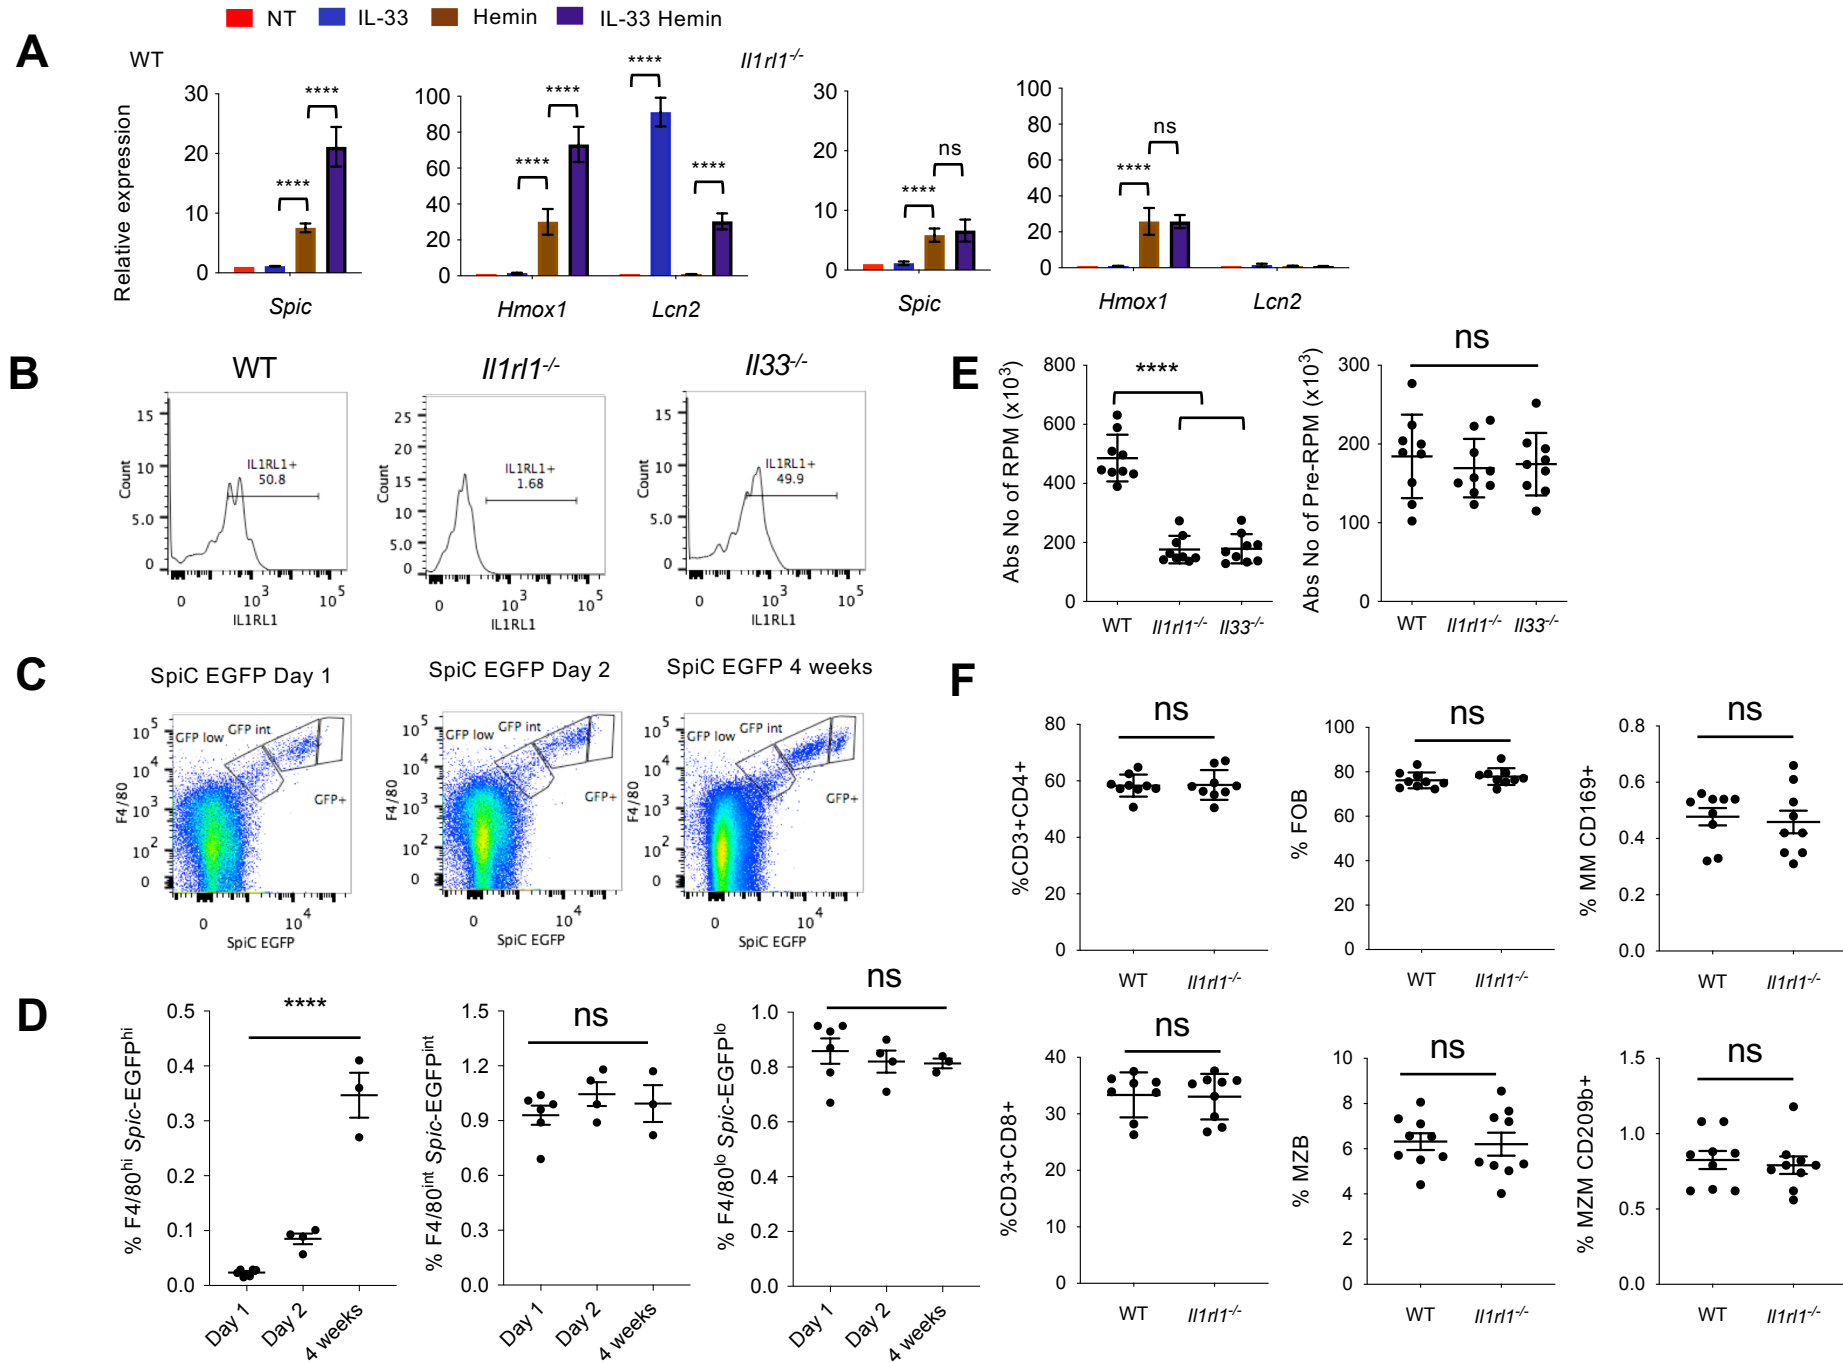

**Figure S2 related to Figure 2. IL1RL1 (ST2) signalling controls the development of splenic red pulp macrophages (RPM).** **A**, *Spic*, *Hmox1* and *Lcn2* mRNA expression in wild type (WT) and *Il1rl1*<sup>-/-</sup> mouse bone marrow-derived macrophages stimulated *in vitro* for 4 days with IL-33 (10 ng/mL), hemin (40 μM), or a combination of hemin and IL-33, compared to untreated cells (NT). Data are representative of 5 independent experiments per group. **B**, Representative examples of IL1RL1 (ST2) expression in splenic RPM (CD11b<sup>lo</sup> F4/80<sup>hi</sup>) of wild-type (WT), *Il1rl1*<sup>-/-</sup> (negative control), and *Il33*<sup>-/-</sup> mice. **C**, Representative examples of *Spic*-EGFP and F4/80 expression by flow cytometry in spleens of neonates (Day 1 and Day 2) and young (4 weeks old) mice. **D**, Quantification of F4/80<sup>hi</sup> *Spic*-EGFP<sup>hi</sup>, F4/80<sup>int</sup> *Spic*-EGFP<sup>int</sup> and F4/80<sup>lo</sup> *Spic*-EGFP<sup>lo</sup> cells (percentages among CD11c<sup>low</sup> Ly6G<sup>low</sup> NK1.1<sup>low</sup> SSC-A<sup>low</sup> cells). **E**, Quantification of RPM and pre-RPM (absolute numbers) in spleens of 6 weeks and 42 weeks old wild type (WT), *Il33*<sup>-/-</sup>, and *Il1rl1*<sup>-/-</sup> mice. **F**, Quantification of other immune cell types in spleens of 6 weeks old wild type (WT) and *Il1rl1*<sup>-/-</sup> mice. FOB= Follicular B cells; MZB= marginal zone B cells; MM= Metallophilic macrophages; MZM= Marginal zone macrophages. Each dot in **D**, **E** and **F** represents a separate mouse. \*\*\*\*P<0.0001.



**Figure S3**

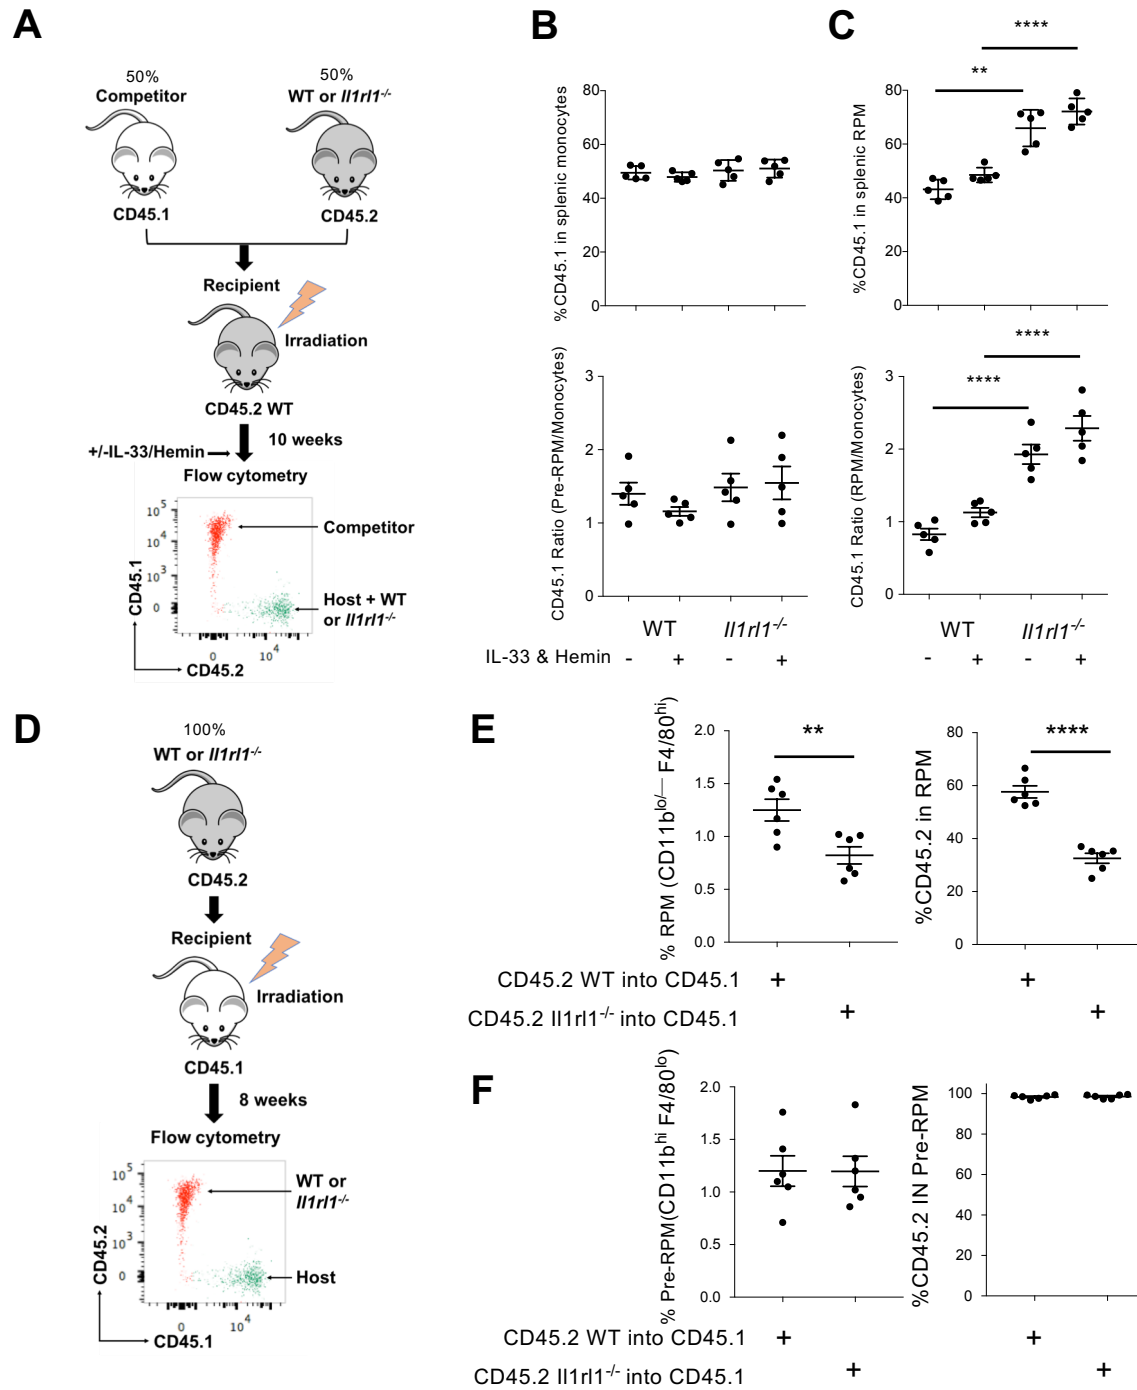

**Figure S3 related to Figure 2. Cell-autonomous requirement of IL1RL1 expression in bone marrow-derived monocytes during the development of splenic red pulp macrophages (RPM).** **A**, Representative scheme of lethal irradiation and reconstitution of CD45.2 WT mice with either 50% CD45.1 + 50% CD45.2 WT or 50% CD45.1 + 50% CD45.2 *Il1rl1*<sup>-/-</sup> bone marrow. 10 weeks later, mice were injected intraperitoneally once a day for 3 days with either phosphate buffered saline (PBS), or IL-33+hemin (see Methods), before they were assayed for CD45.1 and CD45.2 positive cells by flow cytometry. **B, C**, Quantification of CD45.1 positive cells among splenic monocytes (CD11b<sup>hi</sup> F4/80<sup>-</sup>), pre-RPM (CD11b<sup>hi</sup> F4/80<sup>lo</sup>) and RPM (CD11b<sup>lo/-</sup> F4/80<sup>hi</sup>) by flow cytometry. Each dot represents a separate mouse. \*\*P<0.01, \*\*\*\*P<0.001. **D-F**, CD45.1 wild-type (WT) mice were lethally irradiated and reconstituted with either 100% CD45.2 WT or 100% CD45.2 *Il1rl1*<sup>-/-</sup> (**D**) bone marrow. 8 weeks after bone marrow reconstitution, spleens were assayed for CD45.1 and CD45.2 positive RPM (CD11b<sup>lo/-</sup> F4/80<sup>hi</sup>) and pre-RPM (CD11b<sup>hi</sup> F4/80<sup>lo</sup>) by flow cytometry. Quantifications (percentages and absolute numbers) are shown in (**E**) for RPM, and in (**F**) for pre-RPM. Each dot in **E** and **F** represents a separate mouse. \*\*P<0.001. \*\*\*\*P<0.0001.

**Figure S4**

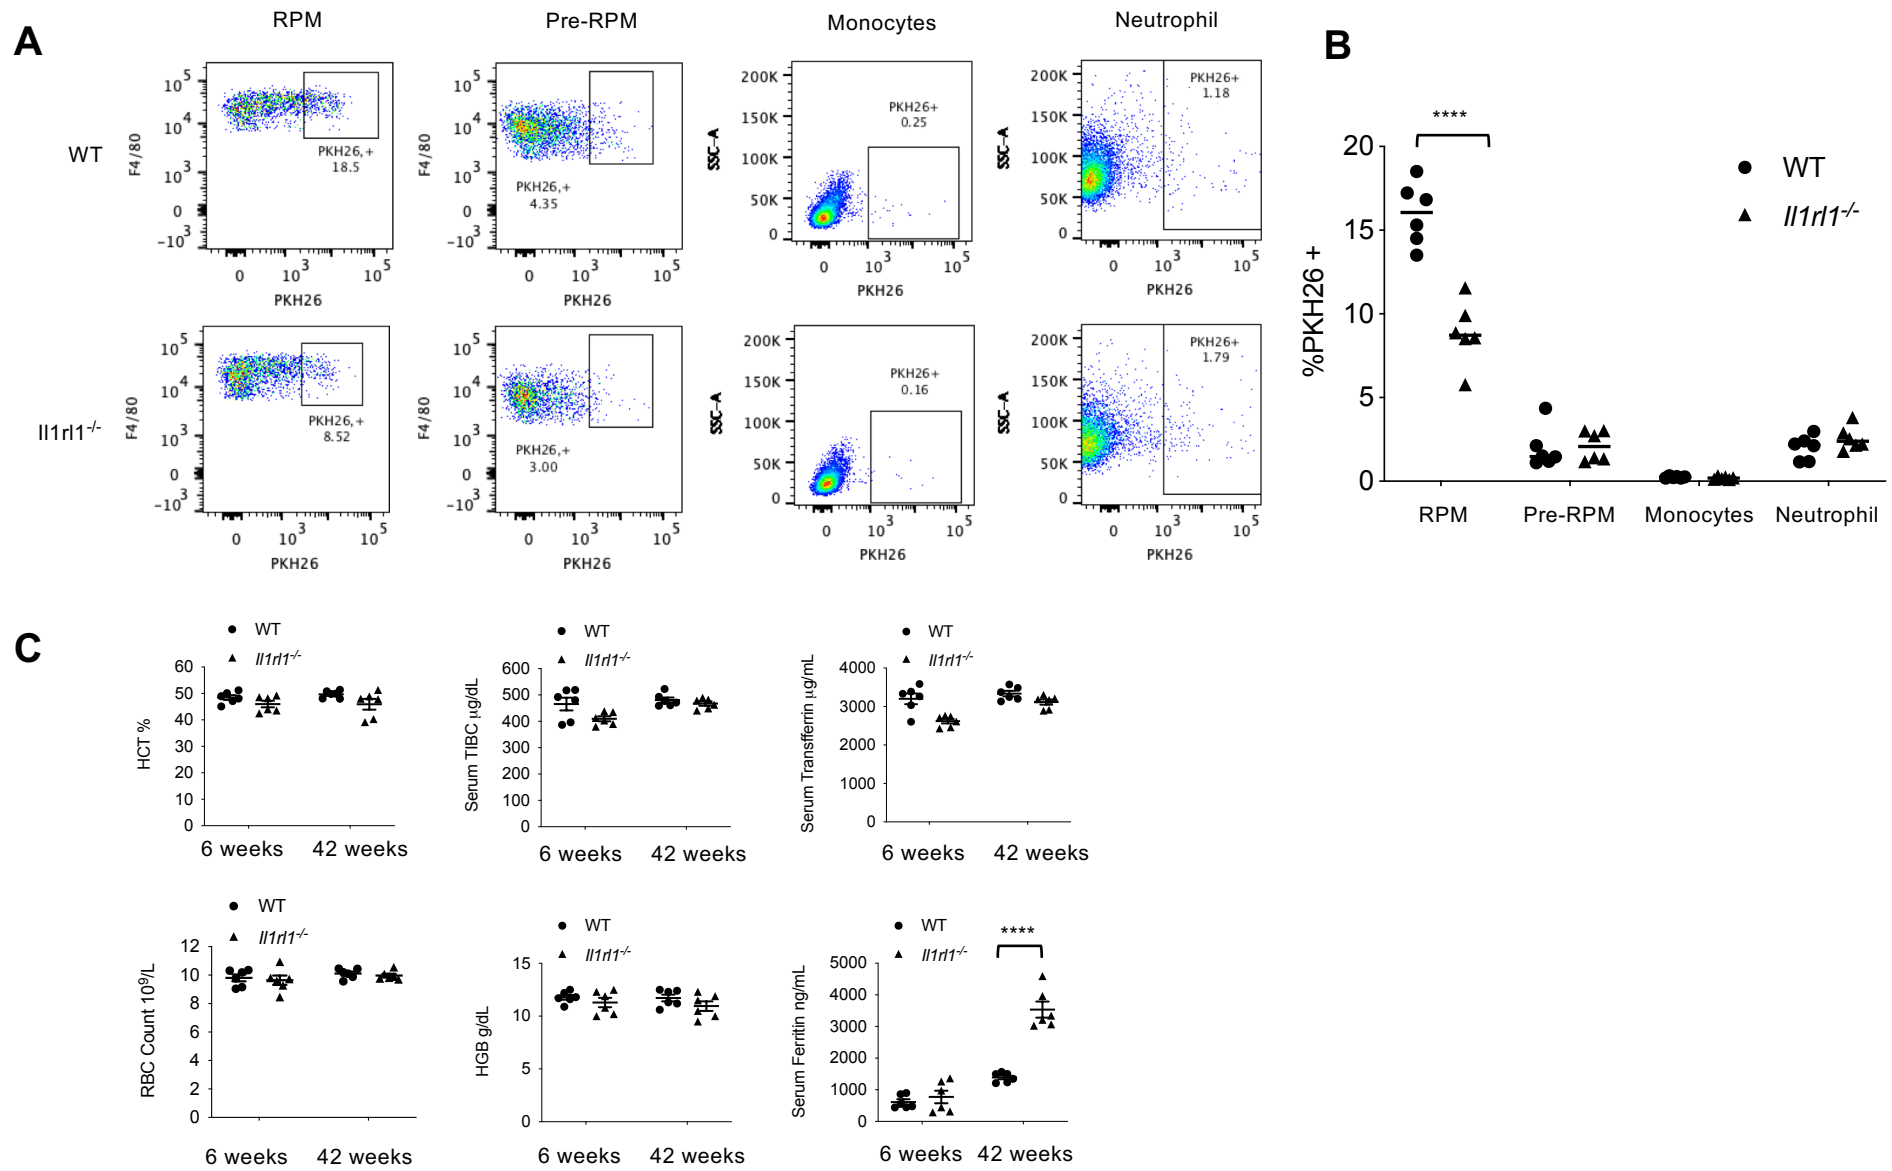

**Figure S4 related to Figure 3. Impact of IL1RL1 (ST2) signalling on the function of splenic red pulp macrophages (RPM)** . Representative examples (6 mice per group) of flow cytometry staining (**A**) and quantification (**B**) of uptake of PKH26-labelled red blood cells by splenic RPM, pre-RPM, monocytes and neutrophils after injection into WT and *Il1rl1*<sup>-/-</sup> mice. **C**, Quantification of hematocrit (HCT), red blood cell (RBC) counts, serum (TIBC), hemoglobin (HGB), transferrin and ferritin in young (6 weeks) and old (42 weeks) WT and *Il1rl1*<sup>-/-</sup> mice. Each dot in **B** and **C** represents a separate mouse. \*\*\*\*P<0.001.

Figure S5

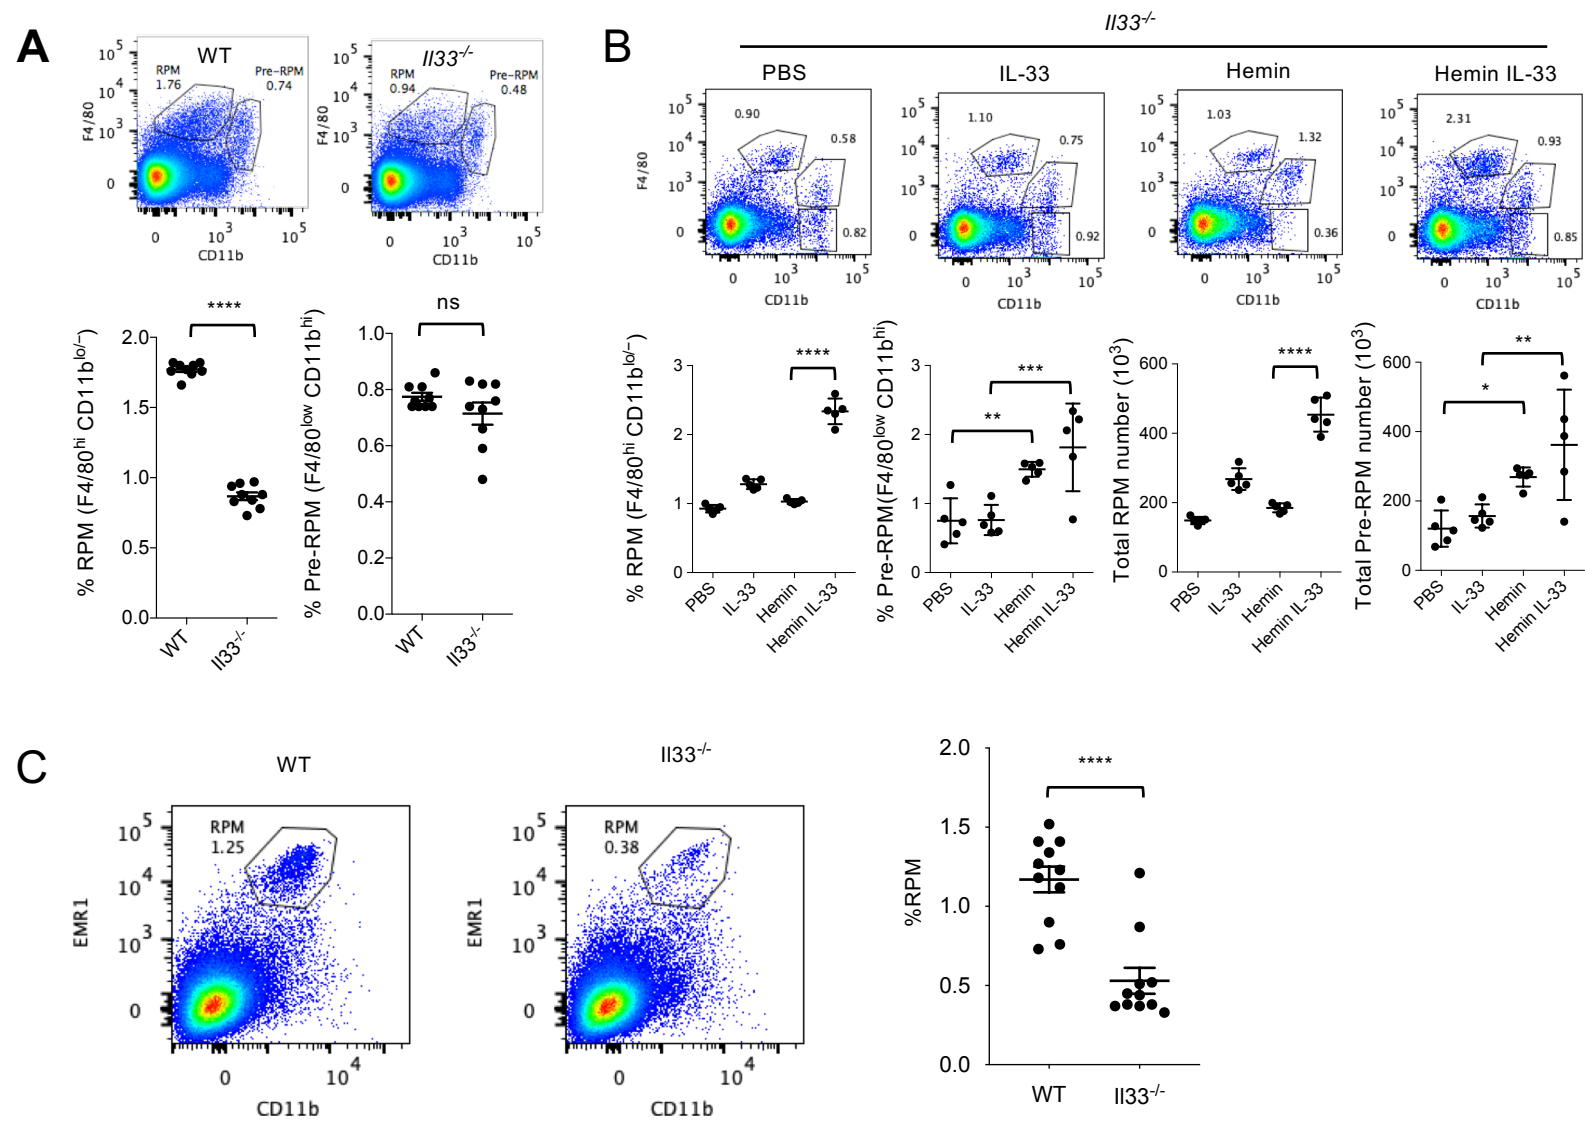

**Figure S5 related to Figure 5. IL-33 signaling controls the development of red pulp macrophages (RPM).** **A**, Representative examples of flow cytometry staining and quantification of RPM and pre-RPM (% among CD11c<sup>low</sup> Ly6G<sup>low</sup> NK1.1<sup>low</sup> SSC-A<sup>low</sup> cells) in spleens of wild type (WT) and *Il33*<sup>-/-</sup> mice, 9 mice per group. Data are representative of at least 5 independent experiments. **B**, Representative examples and quantification (among CD11c<sup>low</sup> Ly6G<sup>low</sup> NK1.1<sup>low</sup> SSC-A<sup>low</sup> cells) of flow cytometry staining for splenic pre-RPM (CD11b<sup>+</sup> F4/80<sup>lo</sup>) and RPM (CD11b<sup>lo/-</sup> F4/80<sup>hi</sup>) in mice injected intraperitoneally once a day for 3 days with either phosphate buffered saline (PBS), IL-33 (1 μg), hemin (500 μg), or IL-33 + hemin, 5 mice per group. Data are representative of at least 4 independent experiments. **C**, Representative examples and quantification of splenic RPM (CD11b<sup>lo/-</sup> EMR1<sup>hi</sup>) in wild-type and *Il33*<sup>-/-</sup> rats. Each dot in **C** represents a separate rat \*\*\*\*P<0.001, data are representative of 2 independent experiments.



**Figure S6**

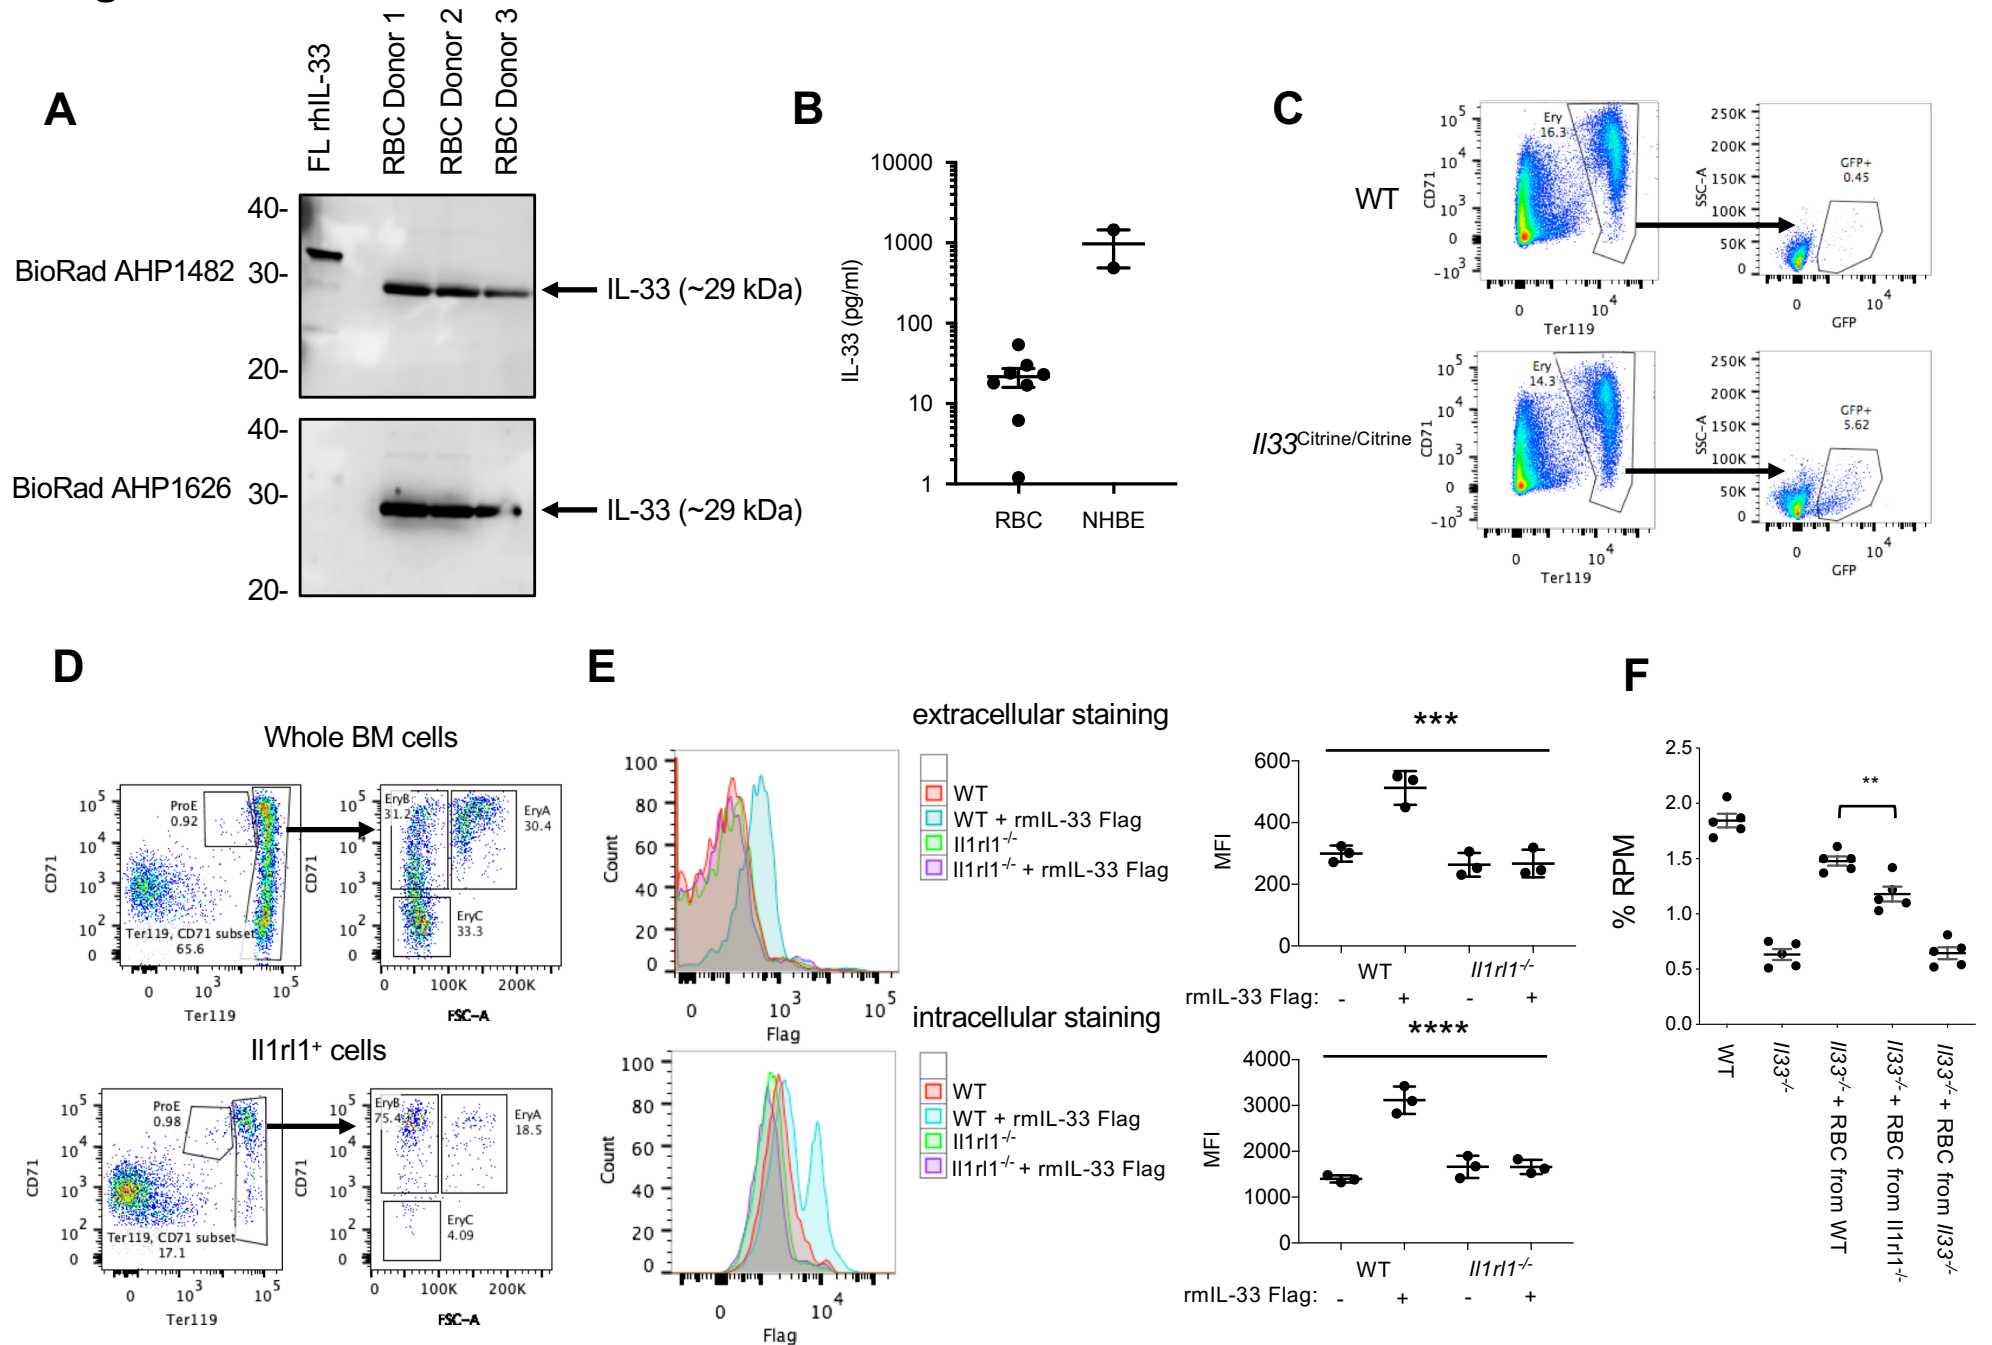

**Figure S6 related to Figure 5. IL-33 in red blood cell (RBC) progenitors and mature RBCs.** **A**, Detection of IL-33 in human red blood cell (RBC) lysates using western blotting and 2 different anti-IL-33 antibodies. Recombinant full-length human IL-33 is included as a positive control. **B**, Quantification of IL-33 protein in RBC lysates. Normal human bronchial epithelial cells (NHBE) are used as positive controls. **C**, Representative examples of flow cytometry showing *Il33*-Citrine<sup>+</sup> RBC progenitors (Ter119<sup>+</sup>/CD71<sup>+</sup> or CD71<sup>-</sup>) in RBC-depleted bone marrow of wild type (WT) and *Il33*<sup>Citrine/Citrine</sup> reporter mice. **D**, Representative examples of flow cytometry staining for pro-erythroid cells (ProE, Ter119<sup>int</sup>/CD71<sup>hi</sup>), and erythroblast subsets A (less mature, Ter119<sup>hi</sup> CD71<sup>hi</sup> FSC<sup>hi</sup>), B (intermediate maturation, Ter119<sup>hi</sup> CD71<sup>hi</sup> FSC<sup>lo</sup>) and C (most mature, Ter119<sup>hi</sup> CD71<sup>lo/-</sup> FSC<sup>lo</sup>) in the bone marrow of wild type mice. IL1RL1 (ST2)<sup>+</sup> cells are enriched in pro-erythroid cells and erythroblast B subset. **E**, recombinant murine IL-33-Flag was incubated with whole bone marrow cells of WT and *Il1rl1*<sup>-/-</sup> mice for 60 min, which was followed by extracellular and intracellular staining for Flag. Results are gated on Ter119<sup>hi</sup> cells (erythroblasts) and mean fluorescence intensity (MFI) is shown. Data are representative of 3 independent experiments. **F**, Quantification (% among CD11c<sup>low</sup> Ly6G<sup>low</sup> NK1.1<sup>low</sup> SSC-A<sup>low</sup> cells) of splenic RPM (CD11b<sup>lo/-</sup> F4/80<sup>hi</sup>) by flow cytometry in WT and *Il33*<sup>-/-</sup> mice. Some *Il33*<sup>-/-</sup> mice were reconstituted with either WT, *Il33*<sup>-/-</sup>, or *Il1rl1*<sup>-/-</sup> RBCs (see Methods) prior to assessment of splenic RPM. \*\*P<0.05, \*\*\*P<0.01, \*\*\*\*P<0.001.

# Figure S7

**A**

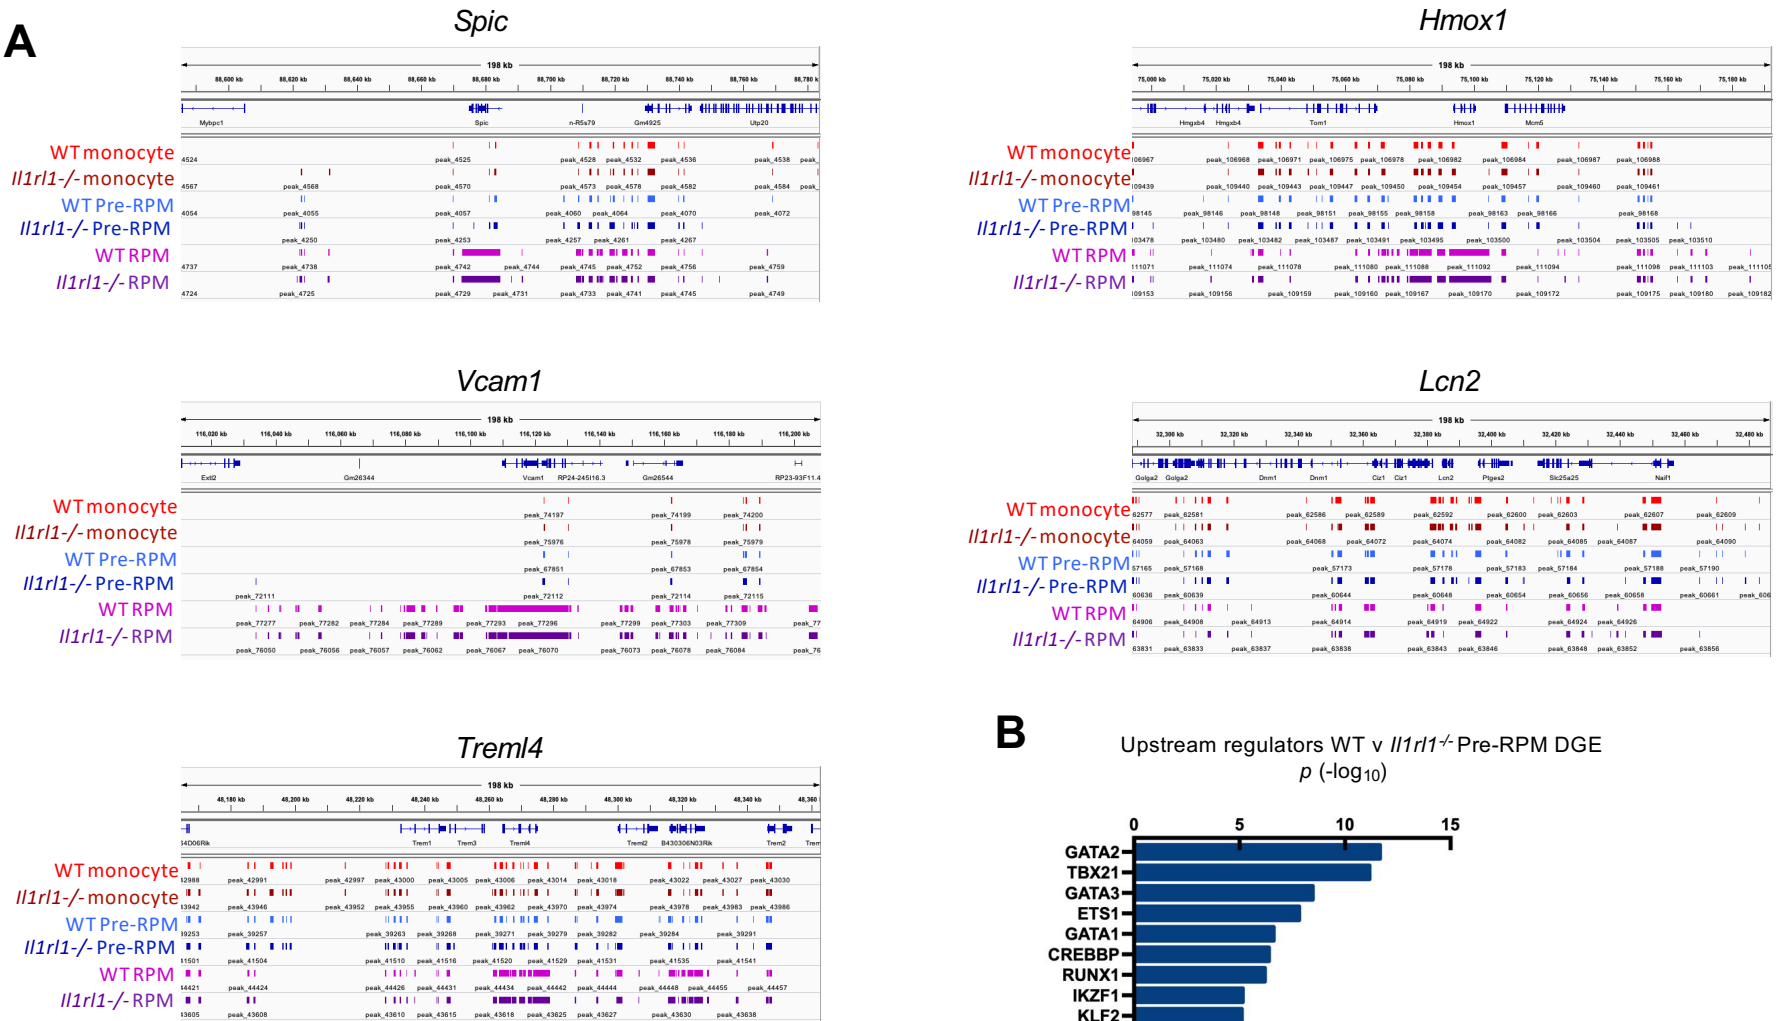

**Figure S7 related to Figures 6 and 7. ATAC-seq and RNA-seq of splenic monocytes, pre-RPM and RPM. A,** Examples of peak calling of accessible chromatin by ATAC-seq from splenic monocytes (CD11b<sup>hi</sup> F4/80<sup>-</sup>), pre-RPM (CD11b<sup>hi</sup> F4/80<sup>lo</sup>) and RPM (CD11b<sup>lo/-</sup> F4/80<sup>hi</sup>) from WT and *Il1rl1*<sup>-/-</sup> mice, n=4 per group. **B,** Top upstream transcriptional regulators for differentially expressed genes (DGE) in WT and *Il1rl1*<sup>-/-</sup> pre-RPM (adjusted p-value <0.05), identified by Ingenuity pathway analysis.
